# Supplementary material for: Corannulene-based nanographene containing helical motifs
Source: Royal Society of Chemistry journal article supplement (doi:10.1039/d1qo00366f), 2021-01-01
Supplement: d1qo00366f1.pdf [file d1qo00366f1.pdf]

## Supporting Information

### Corannulene-based nanographene containing helical motifs

Qi Xu,<sup>Δa</sup> Chu Wang,<sup>Δa</sup> Jing He,<sup>a</sup> Xiaonan Li,<sup>a</sup> Ying Wang,<sup>a</sup> Xuebo Chen,<sup>a</sup> Di Sun<sup>b</sup> and  
Hua Jiang<sup>\*a</sup>

[a] College of Chemistry, Beijing Normal University, Beijing 100875, China

[b] School of Chemistry and Chemical Engineering, Shandong University, Jinan 250100, China

[\*] E-mail: [jiangh@bnu.edu.cn](mailto:jiangh@bnu.edu.cn)

[Δ] These authors contributed equally.

## CONTENTS

|   |                                                  |    |
|---|--------------------------------------------------|----|
| 1 | General Information.....                         | 3  |
| 2 | Synthesis .....                                  | 4  |
| 3 | X-ray Crystallography .....                      | 7  |
| 4 | Optical Resolution by Chiral HPLC .....          | 14 |
| 5 | Photophysical Study .....                        | 15 |
| 6 | Computational Study .....                        | 15 |
| 7 | NMR, IR and Mass Spectra .....                   | 22 |
| 8 | Cartesian coordinates of optimized species ..... | 30 |
| 9 | Reference .....                                  | 61 |

## 1 General Information

Unless otherwise noted, all materials including dry solvent were obtained from commercial suppliers and used without further purification. All reactions were performed with dry solvents under Argon in dried glassware with standard vacuum-line techniques. Compounds **3**<sup>S1</sup>, **4**<sup>S2</sup>, **6**<sup>S1</sup> and **7**<sup>S3</sup> were prepared according to the reported literatures. Work-up and purification procedures were carried out with reagent-grade solvents under air.

Analytical TLC was carried out using tapered silica plates with a preadsorbent zone. NMR spectra were recorded on BRUKER AVENCE 400 MHz or JOEL 400 MHz. Chemical shifts were reported relative to the standard solvent signals on literature. The chemical shift references were as follows: (<sup>1</sup>H) dichloromethane-d, 5.32 ppm; (<sup>13</sup>C) dichloromethane-d, 53.84; (<sup>1</sup>H) chloroform-d, 7.26 ppm; (<sup>13</sup>C) chloroform-d, 77.16 ppm. Mass spectra (ESI, MALDI) were acquired on GCT and FT-ICR spectrometer (Bruker Daltonics Inc. APEXII, BIFLEX III), respectively. UV-Vis, Fluorescence, CD and CPL spectra were recorded in a quartz cell (light path 10 mm). Fluorescence spectra were measured on FS5 and FLS980, and UV-Vis spectra were recorded on Shimadzu UV 3600. CD spectra were recorded on a Chirascan<sup>TM</sup> Circular Dichroism spectrometer (Applied Photophysics Ltd, Surrey, United Kingdom). CPL spectra were gained with Chirascan-CPL, Applied Photophysics. The absolute fluorescence quantum yield was determined by an absolute method using an integrating sphere excited at 350 nm for **1** and 398 nm for **2** using a 150 W Xenon lamp. The fluorescence Electronic Supplementary Material (ESI) for lifetimes were excited with a supercontinuum ultrafast fiber laser, using the time correlated single-photon-counting (TCSPC) method. Typically, 10000 counts were collected at the peak channel, and the decay curves were fitted by least-squares deconvolution with original Edinburgh Instrument software; the quality of the parameters were judged by the reduced  $\chi^2$  values and the randomness of the weighted residuals.

## 2 Synthesis

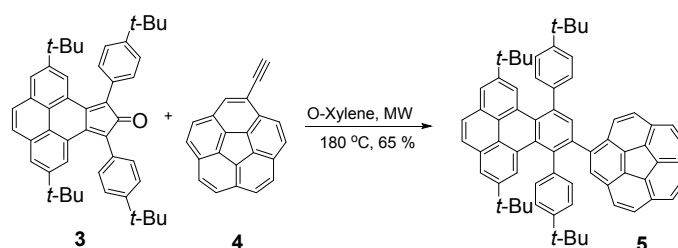

Into an oven-dried (2-5) mL glass reaction vial equipped with a Teflon coated magnetic stirring bar was added **3** (30 mg, 0.05 mmol) and **4** (15 mg, 0.06 mmol). The vial was then sealed with a PTFE-Silicon septum in an Intellivent Cap and purged repeatedly with argon. Anhydrous O-Xylene (3 mL) was added to this solid mixture, and the vial was then irradiated with microwaves in a CEM Discover Microwave Unit, at 180 °C for 1 h. The reaction mixture was cooled and then washed with excess methylene chloride. The organic solution was extracted three times with water, dried with magnesium sulfate, and filtered. Removal of the solvent under reduced pressure, the residue was purified by flash chromatography (light petroleum ether/dichloromethane = 8/1, v/v,  $R_f = 0.30$ .) to give **5** (27 mg, 65 %) as a white solid. m.p. = 260-262 °C.  $^1\text{H NMR}$  (400 MHz,  $\text{CDCl}_3$ , 298 K),  $\delta$  = 8.37 (d, 1 H,  $J = 1.20$  Hz), 8.26 (d, 1 H,  $J = 1.12$  Hz), 7.97 (d, 1 H,  $J = 1.20$  Hz), 7.95 (d, 1 H,  $J = 1.16$  Hz), 7.94 (s, 2 H), 7.79-7.78 (2 H), 7.77-7.75 (d, 2 H,  $J = 6.12$  Hz), 7.73-7.72 (d, 1 H,  $J = 5.80$  Hz), 7.70 (1 H), 7.65-7.61 (2 H), 7.54-7.53 (d, 1 H,  $J = 5.88$  Hz), 7.47-7.46 (d, 1 H,  $J = 5.40$  Hz), 7.40-7.39 (5 H), 7.20-7.19 (d, 1 H,  $J = 5.04$  Hz), 7.01 (1 H), 6.95 (1 H), 1.33 (s, 18 H), 1.14 (s, 18 H), 1.09 (s, 18 H).  $^{13}\text{C NMR}$  (100 MHz,  $\text{CDCl}_3$ , 298 K),  $\delta$  = 150.6, 150.1, 147.7, 143.4, 141.0, 139.8, 139.7, 139.3, 137.1, 136.6, 134.6, 133.3, 132.9, 132.5, 132.3, 131.8, 131.7, 131.6, 131.5, 131.4, 131.3, 130.3, 129.6, 128.6, 128.1, 127.9, 127.8, 127.7, 127.1, 126.6, 126.4, 124.6, 124.2, 122.9, 122.8, 78.2, 78.1, 77.9, 77.6, 35.7, 35.4, 35.2, 32.3, 32.0. FT-IR (ATR):  $\tilde{\nu}$  = 3032, 2961, 2930, 2866, 1686, 1607, 1510, 1476, 1460, 1393, 1364, 1265, 1113, 1017, 883, 833, 785, 735, 662, 583  $\text{cm}^{-1}$ . HR-MS (MALDI-TOF): m/z:  $[\text{M}+\text{H}]^+$  Calcd for  $\text{C}_{68}\text{H}_{61}$  877.4695, found 877.4761.

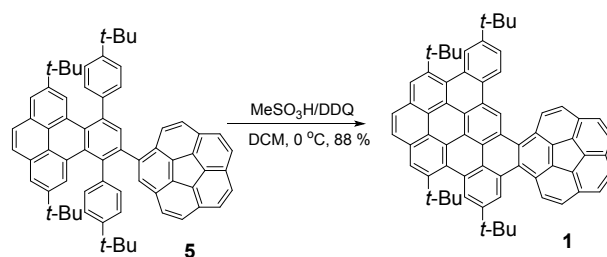

To a solution of **5** (26 mg, 0.03 mmol) in dichloromethane (13 mL),  $\text{MeSO}_3\text{H}$  (1.71 mL) was added slowly at 0 °C. Subsequently DDQ (20 mg, 0.09 mmol) was added in one portion. The reaction mixture was quenched after stirring for 12 h at 0 °C with a saturated solution of  $\text{NaHCO}_3$  (70 mL). The solution was stirred vigorously for another 30 min. The organic layer was separated and the aqueous phase was extracted with dichloromethane ( $2 \times 50$  mL), washed with water (50 mL), dried over  $\text{Na}_2\text{SO}_4$  and the solvent was evaporated under reduced pressure. The residue was purified by column

chromatography on SiO<sub>2</sub> (light petroleum ether/ dichloromethane = 8:1, v/v, R<sub>f</sub> = 0.29) to give the product **1** (23 mg, 88 %) as a yellow solid. m.p. = 275-277 °C. <sup>1</sup>H NMR (400 MHz, CDCl<sub>3</sub>, 298 K): δ = 11.24 (s, 1 H), 9.72 (s, 1 H), 9.33-9.32 (d, 1 H, *J* = 8.60 Hz), 9.17-9.15 (d, 1 H, *J* = 8.84 Hz), 9.07 (s, 1H), 9.05-9.03 (d, 1 H, *J* = 5.72 Hz), 9.02 (s, 1 H), 8.92 (s, 1 H), 8.74 (s, 1 H), 8.53-8.50 (d, 2 H, *J* = 7.84 Hz), 8.09-8.07 (t, 2 H, *J* = 11.24 Hz), 8.01-7.99 (d, 1 H, *J* = 8.56 Hz), 7.95-7.90 (dd, 4 H, *J*<sub>1</sub> = 8.72 Hz, *J*<sub>2</sub> = 8.64 Hz), 1.88 (s, 9 H), 1.85 (s, 9 H), 1.77 (s, 9 H), 1.61 (s, 9 H). <sup>13</sup>C NMR (100 MHz, CDCl<sub>3</sub>, 298 K), δ = 147.0, 146.7, 146.1, 145.5, 139.1, 137.7, 137.5, 136.3, 136.2, 132.7, 132.2, 131.9, 131.7, 131.0, 130.9, 130.6, 130.5, 130.4, 130.3, 129.9, 129.8, 129.7, 129.4, 129.3, 129.2, 129.1, 128.3, 127.9, 127.8, 127.6, 125.8, 125.6, 125.4, 125.3, 125.0, 124.9, 123.9, 123.4, 122.8, 22.2, 39.9, 39.7, 36.6, 36.2, 36.1, 35.8, 32.9, 32.6, 30.6, 30.2. FT-IR (ATR):  $\tilde{\nu}$  = 2961, 2926, 2864, 1670, 1609, 1597, 1478, 1460, 1385, 1364, 1308, 1262, 891, 831, 719, 683, 642, 583 cm<sup>-1</sup>. HR-MS (MALDI-TOF): *m/z*: [M+H]<sup>+</sup> Calcd for C<sub>68</sub>H<sub>55</sub> 871.4226, found 871.4215.

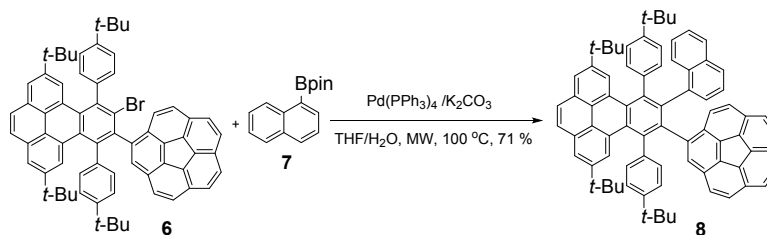

Into an oven-dried (2-5) mL glass reaction vial equipped with a Teflon coated magnetic stirring bar was added **6** (20 mg, 0.021 mmol), **7** (10 mg, 0.039 mmol), Pd(PPh<sub>3</sub>)<sub>4</sub> (3.6 mg, 0.003 mmol) and K<sub>2</sub>CO<sub>3</sub> (26 mg, 0.188 mmol) in THF (3 mL) and H<sub>2</sub>O (1.5 mL) under Argon atmosphere, and the vial was then irradiated with microwaves in a CEM Discover Microwave Unit, at 100 °C for 1 h. The reaction mixture was cooled and then washed with excess methylene chloride. The organic solution was extracted three times with water, dried with magnesium sulfate, and filtered. Removal of the solvent under reduced pressure, the residue was purified by flash chromatography (light petroleum ether/dichloromethane = 5/1, v/v, R<sub>f</sub> = 0.25.) to give **8** (15 mg, 71 %) as a yellow solid. m.p. = 247-249 °C. <sup>1</sup>H NMR (400 MHz, CDCl<sub>3</sub>, 298 K): δ = 8.42 (d, 1 H, *J* = 1.76 Hz), 8.31-8.30 (d, 1 H, *J* = 1.48 Hz), 7.94-7.92 (3 H), 7.90-7.89 (d, 1 H, *J* = 1.80 Hz), 7.85-7.83 (d, 1 H, *J* = 1.80 Hz), 7.70-7.69 (d, 2 H, *J* = 3.28 Hz), 7.67-7.65 (d, 1 H, *J* = 8.36 Hz), 7.63-7.61 (d, 1 H, *J* = 8.72 Hz), 7.53 (s, 2 H), 7.48-7.46 (d, 1 H, *J* = 7.76 Hz), 7.44-7.41 (d, 1 H, *J* = 8.88 Hz), 7.37-7.36 (d, 1 H, *J* = 3.4 Hz), 7.30-7.28 (d, 1 H, *J* = 7.44 Hz), 7.23-7.21 (d, 1 H, *J* = 7.00 Hz), 7.04-7.02 (d, 3 H, *J* = 10.24 Hz), 6.95 (d, 1 H, *J* = 1.52 Hz), 6.92 (s, 1 H), 6.89-6.87 (1 H), 6.85-6.83

(1 H), 6.77-6.74 (dd, 1H,  $J_1 = 2.04$  Hz,  $J_2 = 2.08$  Hz), 6.70-6.67 (2 H), 6.23-6.22 (1 H), 6.00-5.99 (1 H), 1.09-1.06 (18 H), 0.97 (s, 9 H), 0.68 (s, 9 H).  $^{13}\text{C}$  NMR (100 MHz,  $\text{CDCl}_3$ , 298 K),  $\delta = 148.7, 148.6, 148.3, 147.0, 146.9, 140.7, 140.2, 139.9, 139.6, 139.3, 139.2, 139.1, 139.0, 138.6, 135.8, 135.6, 135.5, 135.4, 135.3, 135.2, 134.8, 134.4, 134.3, 133.0, 132.8, 132.6, 132.4, 132.2, 132.1, 132.0, 131.8, 131.4, 130.9, 130.7, 130.5, 130.4, 130.3, 130.2, 130.1, 130.0, 129.9, 129.7, 129.5, 129.4, 128.1, 127.8, 127.7, 127.5, 127.2, 127.0, 126.8, 126.6, 126.5, 126.4, 126.3, 125.7, 125.5, 125.1, 125.0, 124.9, 124.7, 124.6, 124.5, 124.2, 124.0, 123.8, 122.1, 122.0, 35.0, 34.9, 34.9, 34.2, 33.8, 31.6, 31.6, 31.5, 31.2, 30.9$ . FT-IR (ATR):  $\tilde{\nu} = 3030, 2963, 2924, 2855, 1665, 1609, 1508, 1460, 1400, 1364, 1269, 1119, 1017, 883, 831, 733, 698, 673, 662, 586$   $\text{cm}^{-1}$ . HR-MS (MALDI-TOF):  $m/z$ :  $[\text{M}+\text{H}]^+$  Calcd for  $\text{C}_{78}\text{H}_{67}$  1003.5165, found 1003.5236.

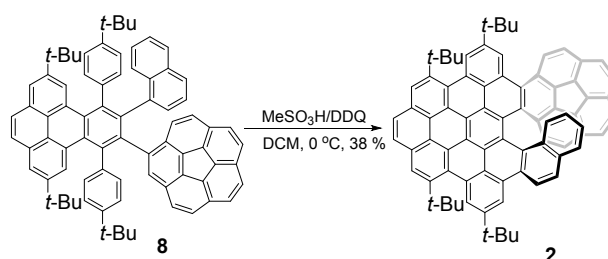

To a solution of **8** (16 mg, 0.016 mmol) in dichloromethane (12 mL),  $\text{MeSO}_3\text{H}$  (1.6 mL) was added slowly at  $0^\circ\text{C}$ . Subsequently DDQ (18 mg, 0.084 mmol) was added in one portion. The reaction mixture was quenched after stirring for 12 h at  $0^\circ\text{C}$  with a saturated solution of  $\text{NaHCO}_3$  (70 mL). The solution was stirred vigorously for another 30 min. The organic layer was separated and the aqueous phase was extracted with dichloromethane ( $2 \times 50$  mL). The combined organic phase was washed with water (50 mL), dried over  $\text{Na}_2\text{SO}_4$  and the solvent was evaporated under reduced pressure. The residue was purified by column chromatography on  $\text{SiO}_2$  (light petroleum ether/dichloromethane = 5:1, v/v,  $R_f = 0.24$ .) to give the product as a green solid (6 mg, 38 %), m.p.  $> 300^\circ\text{C}$ .  $^1\text{H}$  NMR (400 MHz,  $\text{CDCl}_3$ , 298 K)  $\delta = 9.79$  (s, 1 H), 9.30 (s, 1 H), 9.13-9.10 (d, 2 H,  $J = 10.04$  Hz), 9.09-9.08 (d, 1 H,  $J = 5.88$  Hz), 9.06-9.04 (d, 2 H,  $J = 5.80$  Hz), 8.95-8.93 (d, 1 H,  $J = 5.84$  Hz), 8.58 (s, 2 H), 8.09-8.08 (d, 1 H,  $J = 5.52$  Hz), 7.94-7.92 (d, 2 H,  $J = 5.88$  Hz), 7.74-7.72 (d, 1 H,  $J = 5.72$  Hz), 7.68-7.66 (d, 1 H,  $J = 5.76$  Hz), 7.62-7.58 (dd, 2 H,  $J_1 = 5.24$  Hz,  $J_2 = 5.68$  Hz), 7.50-7.48 (d, 1H,  $J = 5.68$  Hz), 7.12-7.09 (t, 1 H,  $J = 9.68$  Hz), 7.02-6.99 (2 H), 6.84-6.82 (d, 1 H,  $J = 5.84$  Hz), 1.88 (18 H), 1.84 (18 H).  $^{13}\text{C}$  NMR (100 MHz,  $\text{CDCl}_3$ , 298 K),  $\delta = 146.2, 145.5, 145.1, 138.0, 137.2, 135.9, 135.8, 135.1, 132.6, 131.9, 131.1, 131.0, 130.7, 130.6, 130.6, 130.5, 130.4, 130.3, 130.2, 129.9, 129.8, 129.6, 129.5, 129.4, 129.0, 128.8, 128.3,$

128.2, 127.8, 127.7, 127.5, 127.4, 127.3, 127.1, 126.9, 126.8, 126.7, 126.4, 125.8, 125.1, 124.6, 124.2, 123.8, 123.4, 123.0, 122.5, 121.8, 121.4, 121.3, 120.1, 119.8, 118.9, 39.1, 39.0, 36.0, 35.3, 35.1, 35.0, 32.2, 31.6, 29.8. FT-IR (ATR):  $\tilde{\nu}$  = 2963, 2922, 2853, 1743, 1680, 1610, 1477, 1462, 1398, 1385, 1362, 1262, 1096, 1020, 827, 797  $\text{cm}^{-1}$ . HR-MS (MALDI-TOF):  $m/z$ :  $[M+H]^+$  Calcd for  $\text{C}_{78}\text{H}_{59}$  995.4539, found 995.4618.

### 3 X-ray Crystallography

Crystals suitable for X-ray analysis were obtained by slow diffusion of acetonitrile into chloroform solution of **1**, toluene solution of **2** and 1,2-Dichloroethane solution of **5**, respectively. Single crystal X-ray diffraction data were collected on a Super Nova, Dual, Cu at zero, AtlasS2 diffractometer. The crystal was kept at 100.00(10) K during data collection. Using Olex2<sup>S4</sup>, the structure was solved with the ShelXT<sup>S5</sup> structure solution program using Direct Methods and refined with the ShelXL<sup>S6</sup> refinement package using Least Squares minimization. The disordered solvent molecules were removed with the SQUEEZE routine in PLATON<sup>S7</sup> and the solvent-free model was employed for the final refinement. All non-hydrogen atoms were refined anisotropically. All hydrogen atoms were positioned by geometric idealization. Additional crystal and refinement information is summarized in **Table S1-S3**.

Crystal Structure Data of compound **5** (CCDC number: **1976758**).

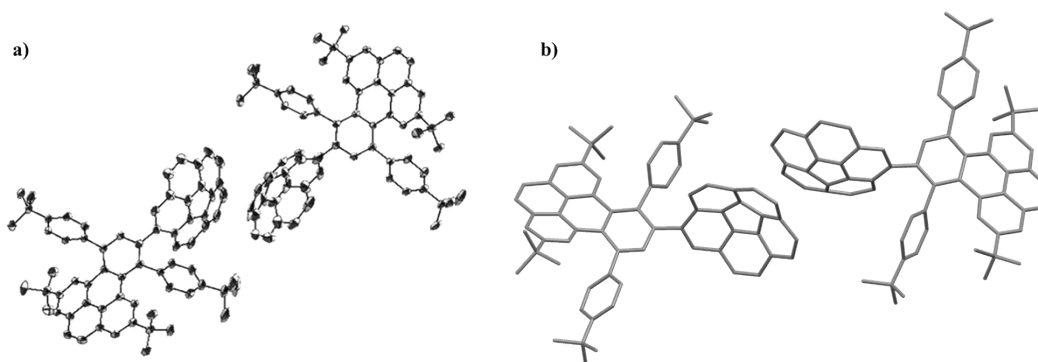

**Figure S1.** Crystal structure of **5** was obtained by slow diffusion of acetonitrile into 1,2-Dichloroethane solution. The thermal ellipsoids are set at a 50 % probability level. Hydrogen atoms are omitted for clarity.

**Table S1.** Crystal data and structure refinement for compound **5**.

|                     |                                |
|---------------------|--------------------------------|
| Identification code | <b>5</b>                       |
| Empirical formula   | $\text{C}_{136}\text{H}_{120}$ |
| Formula weight      | 1754.31                        |
| Temperature/K       | 100.00(10)                     |
| Crystal system      | triclinic                      |
| Space group         | P-1                            |

|                                             |                                                                 |
|---------------------------------------------|-----------------------------------------------------------------|
| a/Å                                         | 18.5396(2)                                                      |
| b/Å                                         | 18.9417(2)                                                      |
| c/Å                                         | 19.29380(10)                                                    |
| $\alpha$ /°                                 | 91.1760(10)                                                     |
| $\beta$ /°                                  | 114.0070(10)                                                    |
| $\gamma$ /°                                 | 115.3930(10)                                                    |
| Volume/Å <sup>3</sup>                       | 5433.04(10)                                                     |
| Z                                           | 2                                                               |
| $\rho_{\text{calc}}$ /g/cm <sup>3</sup>     | 1.072                                                           |
| $\mu$ /mm <sup>-1</sup>                     | 0.453                                                           |
| F(000)                                      | 1872.0                                                          |
| Crystal size/mm <sup>3</sup>                | 0.1 × 0.02 × 0.02                                               |
| Radiation                                   | CuK $\alpha$ ( $\lambda$ = 1.54184)                             |
| 2 $\Theta$ range for data collection/°      | 5.16 to 151.76                                                  |
| Index ranges                                | -19 ≤ h ≤ 23, -23 ≤ k ≤ 23, -23 ≤ l ≤ 23                        |
| Reflections collected                       | 71651                                                           |
| Independent reflections                     | 21828 [ $R_{\text{int}}$ = 0.0405, $R_{\text{sigma}}$ = 0.0373] |
| Data/restraints/parameters                  | 21828/972/1435                                                  |
| Goodness-of-fit on F <sup>2</sup>           | 1.031                                                           |
| Final R indexes [ $I \geq 2\sigma(I)$ ]     | $R_1$ = 0.0778, $wR_2$ = 0.2181                                 |
| Final R indexes [all data]                  | $R_1$ = 0.0883, $wR_2$ = 0.2278                                 |
| Largest diff. peak/hole / e Å <sup>-3</sup> | 0.64/-0.44                                                      |

Crystal Structure Data of compound **1** (CCDC number: **1976760**).

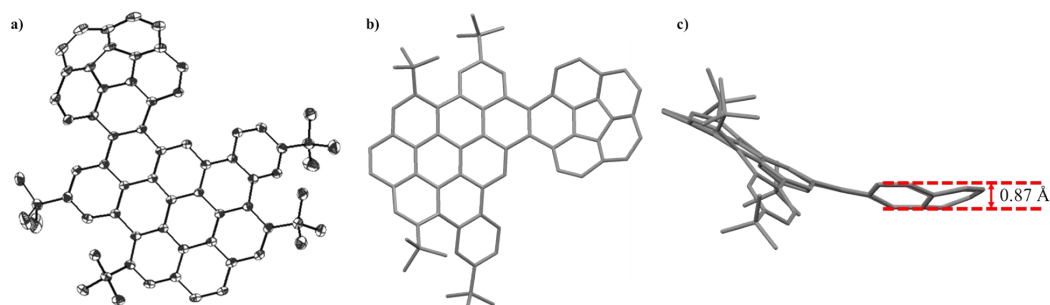

**Figure S2.** Crystal structure of **1** was obtained by slow diffusion of acetonitrile into chloroform solution. The thermal ellipsoids are set at a 50 % probability level. Hydrogen atoms are omitted for clarity.

**Table S2.** Crystal data and structure refinement for compound **1**.

| Identification code | <b>1</b>                        |
|---------------------|---------------------------------|
| Empirical formula   | C <sub>68</sub> H <sub>54</sub> |
| Formula weight      | 871.11                          |
| Temperature/K       | 100.01(10)                      |
| Crystal system      | monoclinic                      |
| Space group         | C2/c                            |
| a/Å                 | 31.3551(6)                      |
| b/Å                 | 9.78470(10)                     |



|                                               |                                                               |
|-----------------------------------------------|---------------------------------------------------------------|
| $c/\text{\AA}$                                | 32.8326(6)                                                    |
| $\alpha/^\circ$                               | 90                                                            |
| $\beta/^\circ$                                | 111.219(2)                                                    |
| $\gamma/^\circ$                               | 90                                                            |
| Volume/ $\text{\AA}^3$                        | 9390.1(3)                                                     |
| Z                                             | 8                                                             |
| $\rho_{\text{calc}}/\text{g/cm}^3$            | 1.232                                                         |
| $\mu/\text{mm}^{-1}$                          | 0.524                                                         |
| F(000)                                        | 3696.0                                                        |
| Crystal size/ $\text{mm}^3$                   | $0.200 \times 0.100 \times 0.060$                             |
| Radiation                                     | CuK $\alpha$ ( $\lambda = 1.54184$ )                          |
| $2\Theta$ range for data collection/ $^\circ$ | 9.532 to 133.2                                                |
| Index ranges                                  | $-30 \leq h \leq 37, -11 \leq k \leq 11, -39 \leq l \leq 36$  |
| Reflections collected                         | 15503                                                         |
| Independent reflections                       | 8281 [ $R_{\text{int}} = 0.0116, R_{\text{sigma}} = 0.0143$ ] |
| Data/restraints/parameters                    | 8281/46/655                                                   |
| Goodness-of-fit on $F^2$                      | 1.034                                                         |
| Final R indexes [ $I \geq 2\sigma(I)$ ]       | $R_1 = 0.0439, wR_2 = 0.1162$                                 |
| Final R indexes [all data]                    | $R_1 = 0.0473, wR_2 = 0.1193$                                 |
| Largest diff. peak/hole / $e \text{\AA}^{-3}$ | 0.33/-0.31                                                    |

Crystal Structure Data of compound **2** (CCDC number: **1976761**).

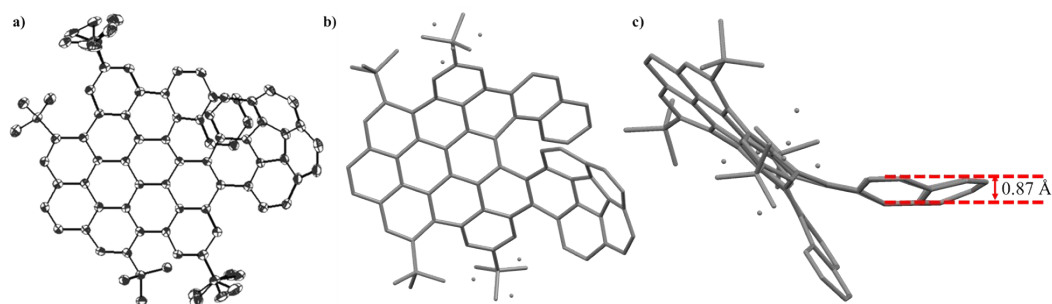

**Figure S3.** Crystal structure of **2** was obtained by slow diffusion of acetonitrile into toluene solution. The thermal ellipsoids are set at a 50 % probability level. Hydrogen atoms are omitted for clarity.

**Table S3.** Crystal data and structure refinement for compound **2**.

| Identification code | <b>2</b>                     |
|---------------------|------------------------------|
| Empirical formula   | $\text{C}_{39}\text{H}_{29}$ |
| Formula weight      | 497.62                       |
| Temperature/K       | 100.00(10)                   |
| Crystal system      | monoclinic                   |
| Space group         | $P2_1/n$                     |
| $a/\text{\AA}$      | 18.1041(3)                   |
| $b/\text{\AA}$      | 13.2301(2)                   |
| $c/\text{\AA}$      | 25.0781(4)                   |
| $\alpha/^\circ$     | 90                           |

|                                               |                                                                |
|-----------------------------------------------|----------------------------------------------------------------|
| $\beta/^\circ$                                | 104.108(2)                                                     |
| $\gamma/^\circ$                               | 90                                                             |
| Volume/ $\text{\AA}^3$                        | 5825.51(17)                                                    |
| Z                                             | 8                                                              |
| $\rho_{\text{calc}}/\text{g/cm}^3$            | 1.135                                                          |
| $\mu/\text{mm}^{-1}$                          | 0.484                                                          |
| F(000)                                        | 2104.0                                                         |
| Crystal size/ $\text{mm}^3$                   | $0.100 \times 0.100 \times 0.100$                              |
| Radiation                                     | Cu K $\alpha$ ( $\lambda = 1.54184$ )                          |
| $2\Theta$ range for data collection/ $^\circ$ | 6.89 to 151.988                                                |
| Index ranges                                  | $-22 \leq h \leq 21, -15 \leq k \leq 16, -31 \leq l \leq 31$   |
| Reflections collected                         | 36721                                                          |
| Independent reflections                       | 11596 [ $R_{\text{int}} = 0.0497, R_{\text{sigma}} = 0.0418$ ] |
| Data/restraints/parameters                    | 11596/18/784                                                   |
| Goodness-of-fit on $F^2$                      | 1.044                                                          |
| Final R indexes [ $I \geq 2\sigma(I)$ ]       | $R_1 = 0.0717, wR_2 = 0.1903$                                  |
| Final R indexes [all data]                    | $R_1 = 0.0842, wR_2 = 0.2072$                                  |
| Largest diff. peak/hole / $e \text{\AA}^{-3}$ | 0.26/-0.31                                                     |

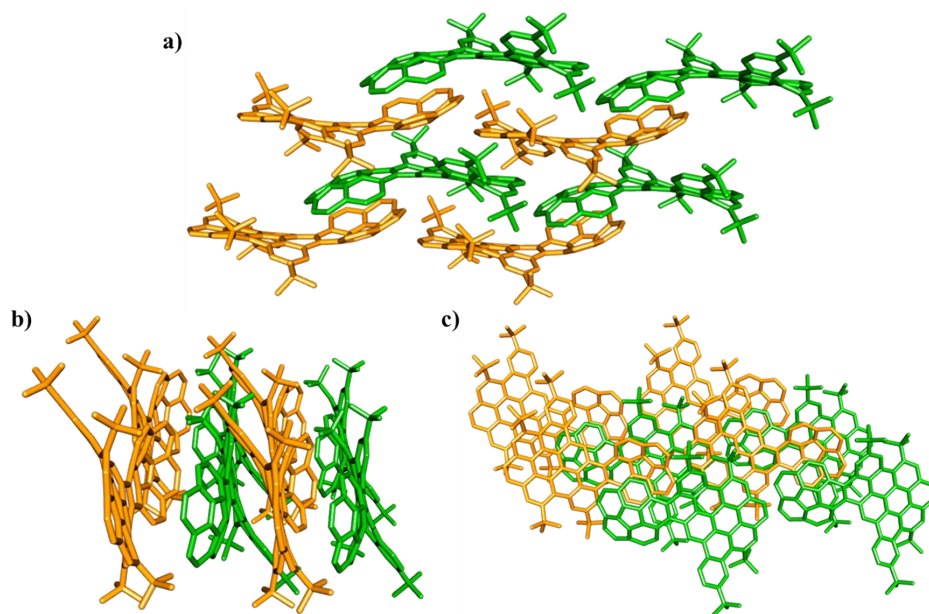

**Figure S4.** Crystal packing pattern of **1** from the top and side views. Hydrogen atoms are omitted for clarity.

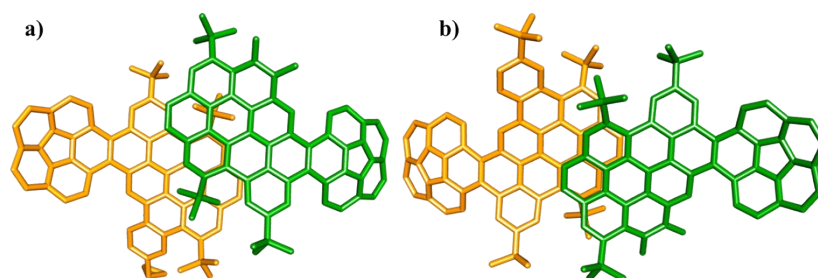

**Figure S5.** The two packing modes of **1** in the solid phase. Hydrogen atoms are omitted

for clarity.

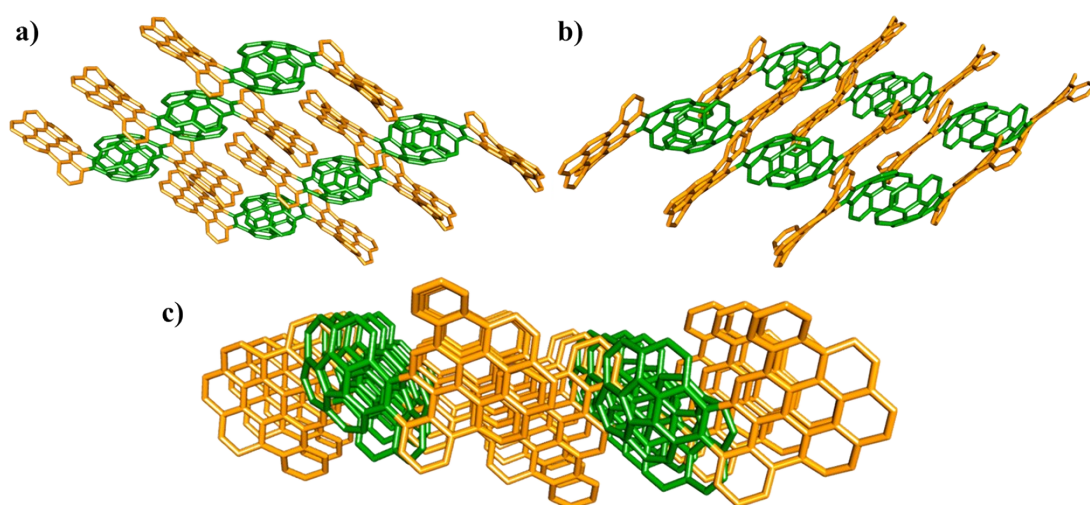

**Figure S6.** The plane-convex  $\pi$ - $\pi$  interaction between the planar nanographene regions and corannulene units of **1** in the solid phase. Hydrogen atoms and *t*-Bu groups are omitted for clarity.

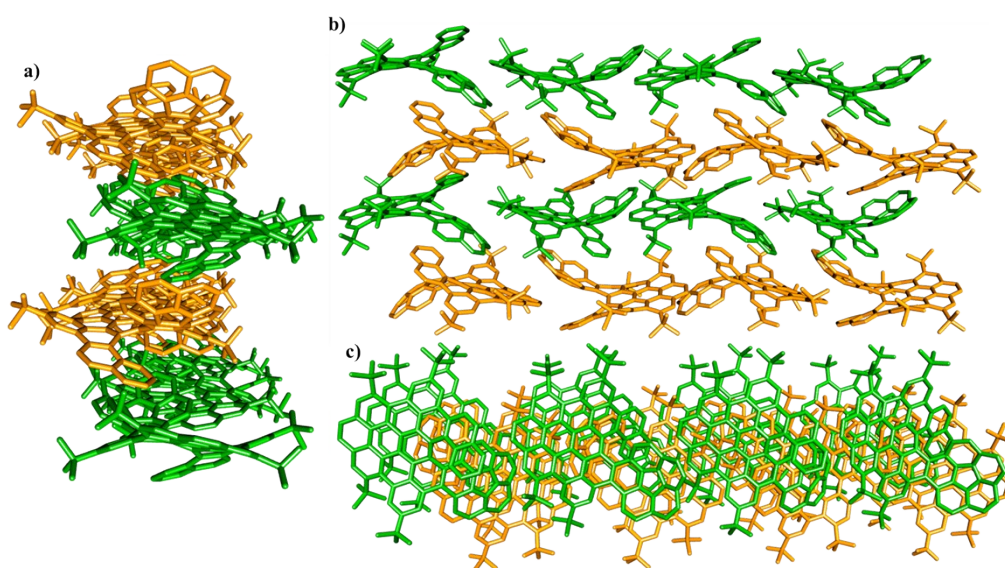

**Figure S7.** Crystal packing pattern of **2** from the top and side views. Hydrogen atoms are omitted for clarity.

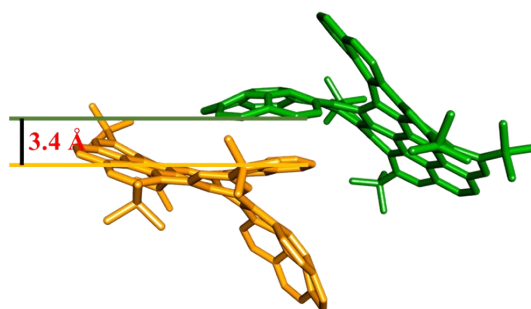

**Figure S8.** The  $\pi$ - $\pi$  distances of **2** in the solid phase. Hydrogen atoms are omitted for

clarity.

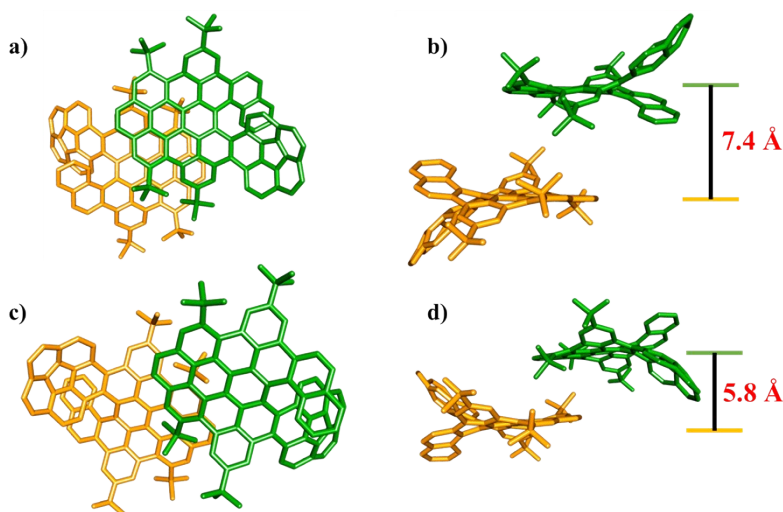

**Figure S9.** The two packing modes and their distances of **2** in the solid phase. Hydrogen atoms are omitted for clarity.

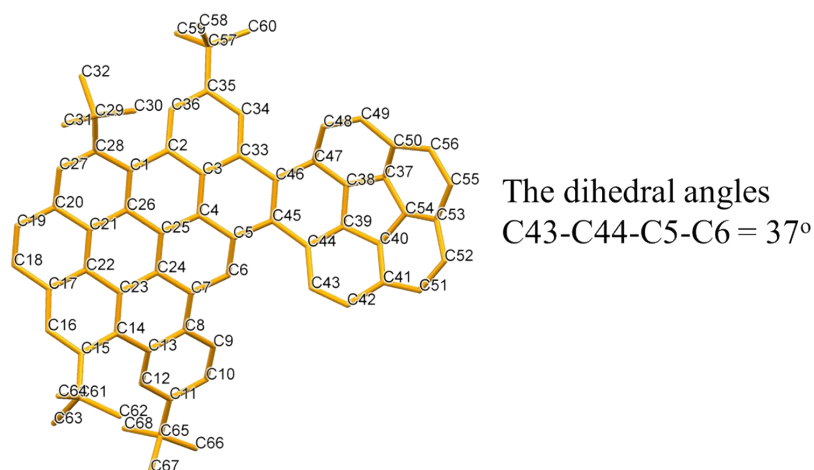

**Figure S10.** Selected dihedral angles for **1** are listed, hydrogen atoms are omitted for clarity.

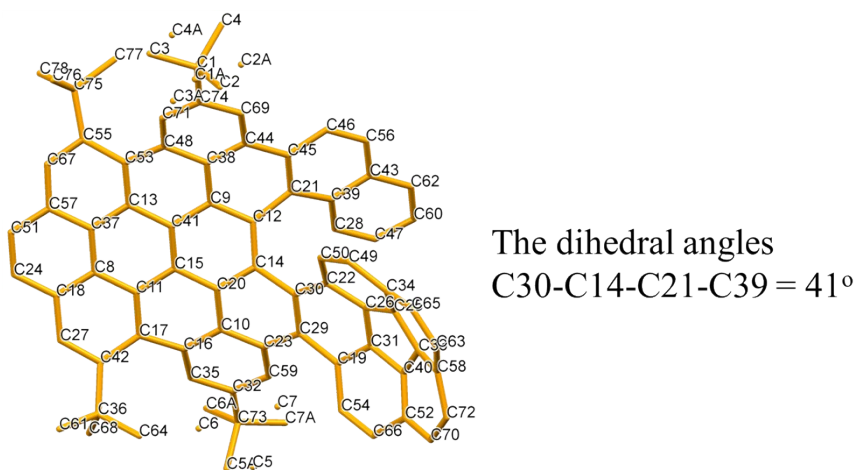

**Figure S11.** Selected dihedral angles for **2** are listed, hydrogen atoms are omitted for

clarity.

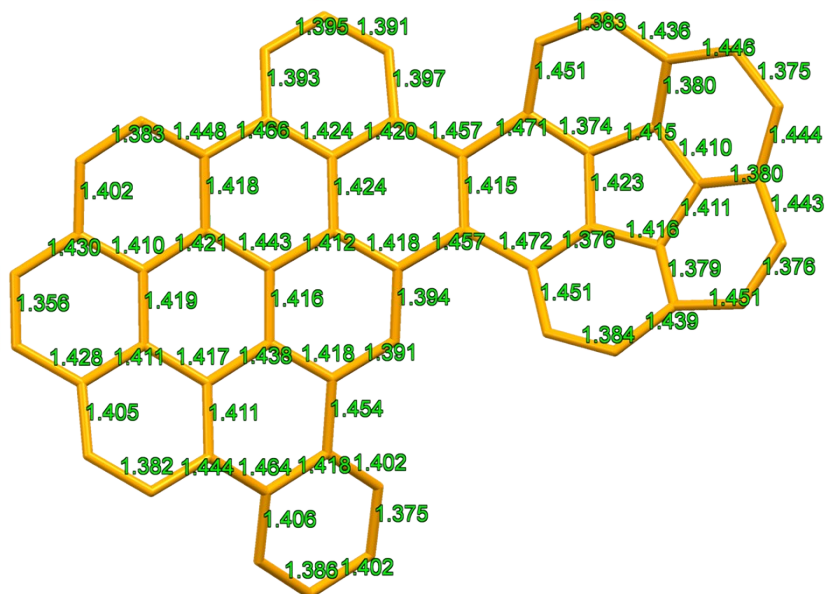

**Figure S12.** Bond lengths for **1** are listed, *t*-Bu groups and hydrogen atoms are omitted for clarity.

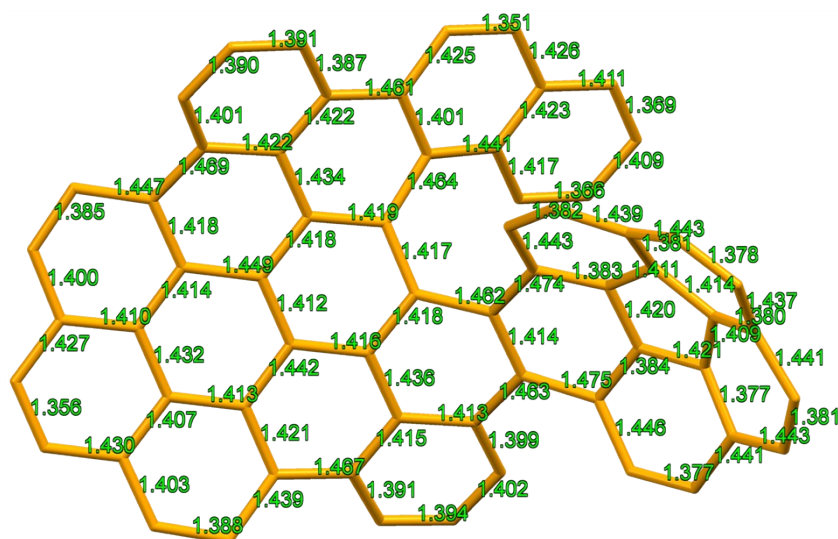

**Figure S13.** Bond lengths for **2** are listed, *t*-Bu groups and hydrogen atoms are omitted for clarity.

#### 4 Optical Resolution by Chiral HPLC

Chiral HPLC analysis of **2**, was performed on an Agilent 1260 instrument equipped with a COSMOSIL Cholester column (10 mm × 250 mm, absorption intensity at 398 nm). A mixture of DCM/MeOH (65/35) was used as the eluent with a flow rate of 2 mL/min at 298K.

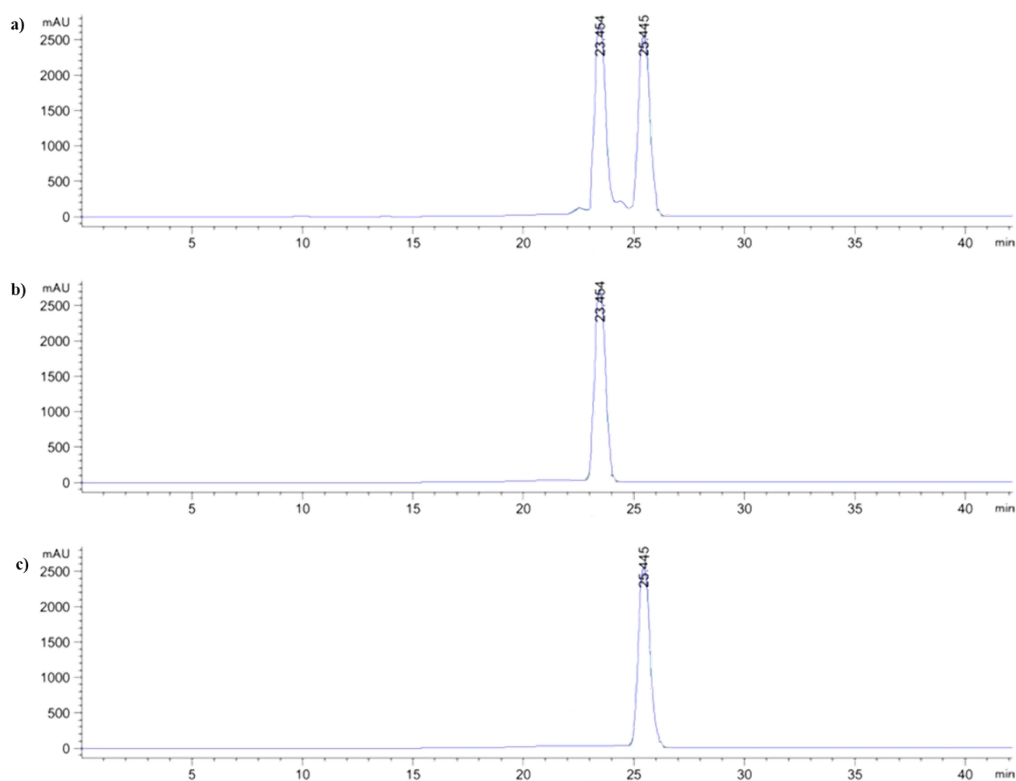

**Figure S14.** HPLC analysis of (a) **2**, (b) the separated **P-2** and (c) the separated **M-2**.

## 5 Photophysical Study

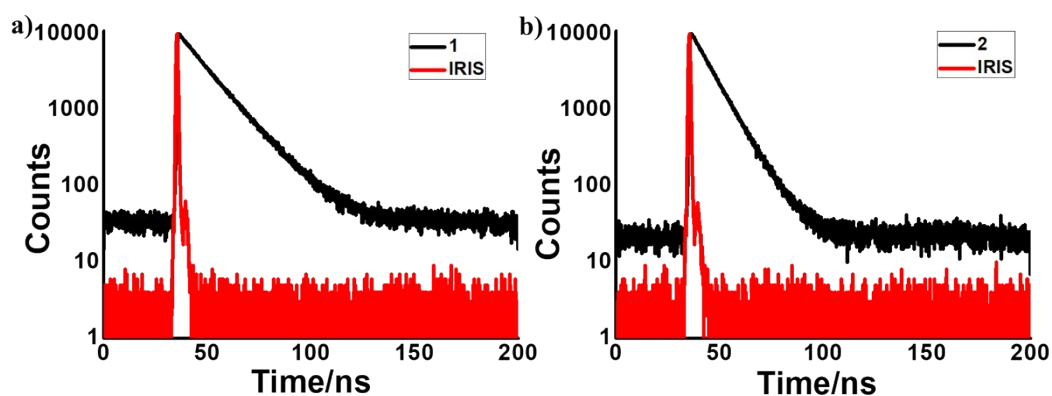

**Figure S15.** Fluorescence lifetimes measured at 487 nm and 580 nm for **1** and **2** in  $\text{CHCl}_3$  ( $1.0 \times 10^{-5}$  M), respectively.

## 6 Computational Study

All calculations were performed using the Gaussian 09<sup>S8</sup> program package. The geometries of bowls **1**, **2** (*t*-Bu groups on pyrene units are omitted) and transition states were optimized at the B3LYP level of density functional theory (DFT) with the 6-31G(d) basis set. Harmonic vibration frequency calculations at the same level were

performed to verify all stationary points as local minima (with no imaginary frequency) or transition states (with one imaginary frequency). Transition states were also verified by IRC calculations. Zero-point energy and Gibbs free energy at 298 K and 1 atm were estimated from the gas-phase studies. The first sixty vertical transition energies for bowls **1** and **2** were calculated by time-dependent density functional theory (TD-DFT) at the B3LYP/6-31G(d)/PCM level (over optimized geometries at the same level). All bright states (oscillator strength  $f > 0.1$ ) and corresponding main single electron transition for **1** and **2** are listed in **Table S4** and **5**. UV-vis spectra of **1** and **2** and CD spectra of **2** were simulated according to TD-DFT results. Nucleus independent chemical shifts (NICS) calculations of **1** and **2** are at the GIAO-B3LYP/6-311+G(2d,p)/PCM computational level and were all carried out according to published procedures.<sup>S9</sup> The ACID plots were generated with Gaussian 09 using the CSGT method and ACID 2.0.0.<sup>S10</sup>

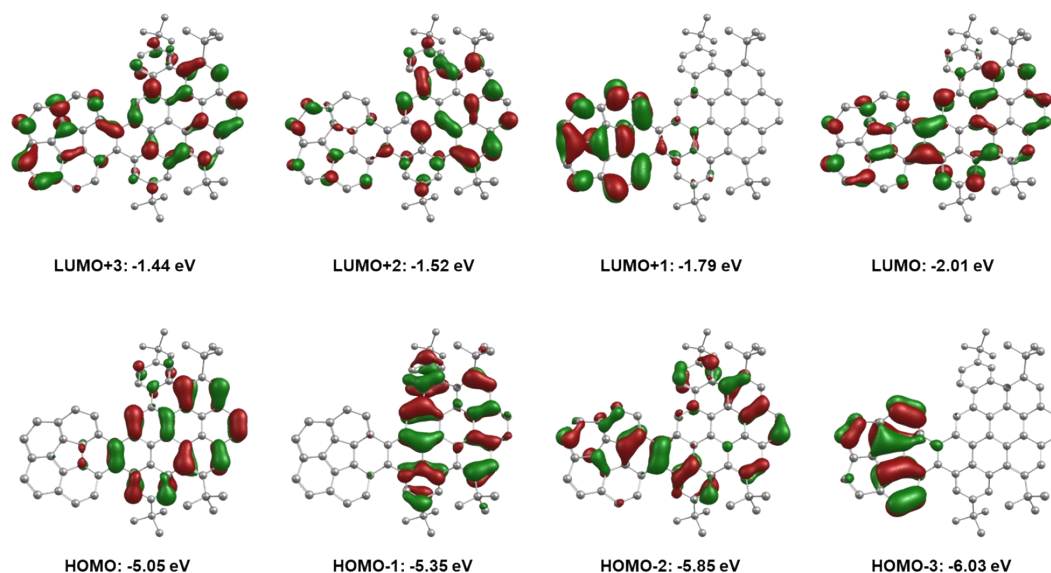

**Figure S16.** Kohn-Sham frontier orbitals and frontier orbital energies for **1** at the optimized S0 geometry at B3LYP/6-31G(d) level of theory in chloroform solution.

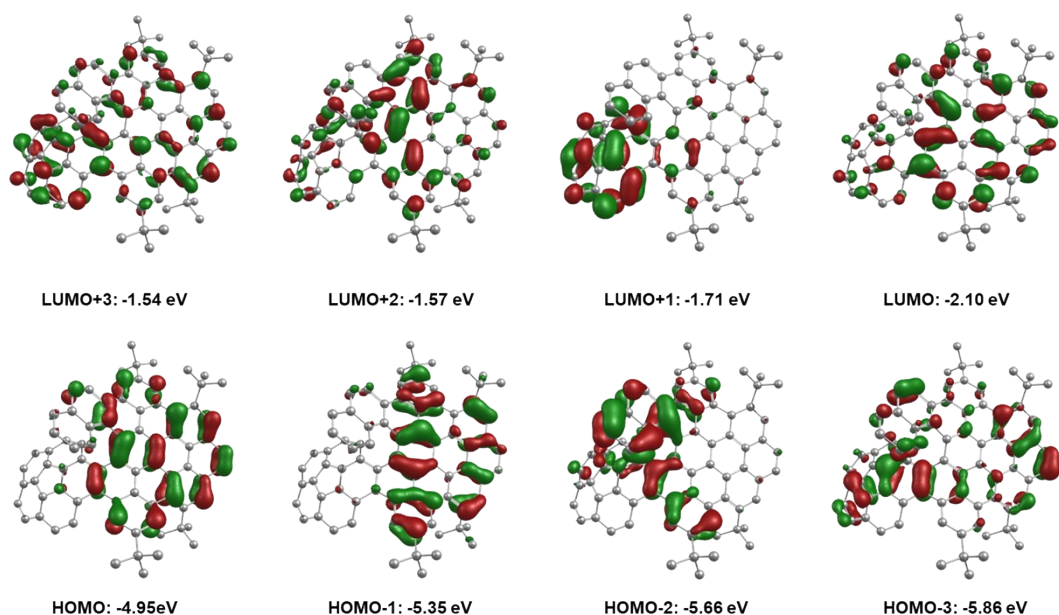

**Figure S17.** Kohn-Sham frontier orbitals and frontier orbital energies for **2** at the optimized S0 geometry at B3LYP/6-31G(d) level of theory in chloroform solution.

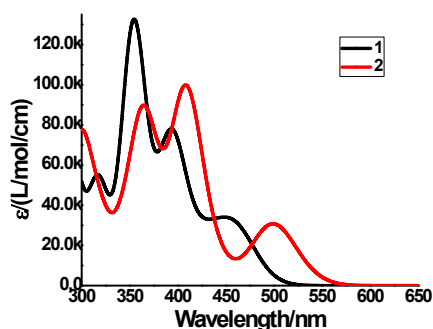

**Figure S18.** Simulated UV-vis spectra of **1** and **2** at the B3LYP/6-31G(d)/PCM level of theory.

**Table S4.** TD-DFT singlet excitation energies  $E$ , excitation wavelengths  $\lambda$ , oscillator strengths  $f > 0.1$ , and orbital contributions for **1** at the optimized S0 ground state geometry in chloroform.

| Energy (eV) | Wavelength (nm) | Osc. Strength | Major contributions                                          |
|-------------|-----------------|---------------|--------------------------------------------------------------|
| 2.68        | 462             | 0.2402        | H→L (89%)                                                    |
| 2.88        | 431             | 0.2109        | H-1→L (18%)<br>H→L+1 (67%)                                   |
| 3.10        | 400             | 0.1556        | H→L+2 (53%)<br>H→L+3 (22%)                                   |
| 3.15        | 393             | 0.4442        | H-1→L (15%)<br>H-1→L+1 (12%)<br>H-1→L+2 (11%)<br>H→L+3 (48%) |



|      |     |        |                                                                 |
|------|-----|--------|-----------------------------------------------------------------|
| 3.17 | 391 | 0.1596 | H-1→L+1 (75%)                                                   |
| 3.45 | 360 | 0.3325 | H-3→L (17%)<br>H-2→L+1 (14%)<br>H-1→L+2 (30%)                   |
| 3.46 | 359 | 0.1254 | H-3→L (35%)<br>H-3→L+1 (22%)<br>H-1→L+2 (17%)                   |
| 3.52 | 352 | 0.6336 | H-4→L (19%)<br>H-1→L+2 (23%)<br>H-1→L+3 (36%)                   |
| 3.53 | 351 | 0.2207 | H-5→L (16%)<br>H-4→L (26%)<br>H-1→L+3 (23%)                     |
| 3.89 | 319 | 0.1662 | H-5→L+1 (20%)<br>H→L+5 (26%)                                    |
| 3.96 | 313 | 0.1709 | H-7→L (25%)<br>H-5→L+1 (22%)<br>H-2→L+3 (11%)                   |
| 4.25 | 292 | 0.1459 | H-7→L+1 (12%)<br>H-6→L+2 (12%)<br>H→L+6 (14%)                   |
| 4.34 | 286 | 0.1459 | H-5→L+3 (61%)<br>H-7→L (25%)<br>H-4→L+2 (12%)                   |
| 4.66 | 266 | 0.1333 | H-8→L+3 (42%)<br>H-2→L+5 (19%)                                  |
| 4.92 | 252 | 0.1189 | H-9→L+2 (14%)<br>H-6→L+4 (12%)<br>H-3→L+5 (29%)<br>H→L+10 (11%) |

**Table S5.** TD-DFT singlet excitation energies  $E$ , excitation wavelengths  $\lambda$ , oscillator strengths  $f > 0.1$ , and orbital contributions for **2** at the optimized S0 ground state geometry in chloroform.

| Energy (eV) | Wavelength (nm) | Osc. Strength | Major contributions                       |
|-------------|-----------------|---------------|-------------------------------------------|
| 2.48        | 499             | 0.3014        | H→L (94%)                                 |
| 2.83        | 438             | 0.1055        | H→L+1 (76%)<br>H→L+2 (11%)                |
| 3.03        | 409             | 0.8266        | H-1→L (34%)<br>H→L+2 (23%)<br>H→L+3 (29%) |
| 3.33        | 373             | 0.1342        | H-4→L (30%)<br>H-1→L+2 (34%)              |

|      |     |        |  |                                                                  |
|------|-----|--------|--|------------------------------------------------------------------|
|      |     |        |  | H-1→L+3 (19%)                                                    |
| 3.39 | 365 | 0.2475 |  | H-6→L (10%)<br>H-1→L+2 (34%)<br>H-1→L+3 (17%)<br>H→L+5 (19%)     |
| 3.43 | 362 | 0.3117 |  | H-7→L (12%)<br>H-2→L+2 (12%)<br>H-1→L+3 (27%)<br>H→L+5 (15%)     |
| 3.63 | 342 | 0.1504 |  | H-2→L+3 (51%)<br>H-1→L+4 (16%)                                   |
| 3.88 | 319 | 0.1034 |  | H-6→L+1 (36%)<br>H-4→L+2 (12%)<br>H→L+6 (10%)                    |
| 4.16 | 298 | 0.1232 |  | H-7→L+2 (31%)<br>H-6→L+2 (12%)<br>H-5→L+3 (31%)                  |
| 4.23 | 293 | 0.1209 |  | H-7→L+3 (10%)<br>H-3→L+4 (35%)<br>H-1→L+6 (19%)                  |
| 4.44 | 279 | 0.1132 |  | H-8→L+3 (23%)<br>H-3→L+5 (14%)<br>H-1→L+7 (11%)<br>H-2→L+8 (11%) |

**Table S6.** Uncorrected and thermal-corrected (298 K) energies of stationary points (Hartree)<sup>a</sup>

| optimized structures   | imaginary frequencies | E(H)           | E+ZPE(H)     | G(H)         |
|------------------------|-----------------------|----------------|--------------|--------------|
| <b>M-1</b>             | 0                     | -1994.95049863 | -1994.385342 | -1994.444133 |
| <b>TS<sub>1</sub></b>  | 1                     | -1994.93245780 | -1994.367694 | -1994.426340 |
| <i>concave-M-1</i>     | 0                     | -1994.94491146 | -1994.379939 | -1994.439047 |
| <b>TS<sub>2</sub></b>  | 1                     | -1994.94196310 | -1994.377873 | -1994.436635 |
| <b>P-1</b>             | 0                     | -1994.95049868 | -1994.385342 | -1994.444132 |
| <b>P-2</b>             | 0                     | -2378.44602014 | -2377.775434 | -2377.840264 |
| <b>TS<sub>1</sub>'</b> | 1                     | -2378.42738530 | -2377.757169 | -2377.821517 |
| <i>concave-P-2</i>     | 0                     | -2378.43571893 | -2377.765301 | -2377.830388 |

<sup>a</sup>) E: electronic energy; ZPE: zero-point energy; G: sum of electronic and thermal free energies.

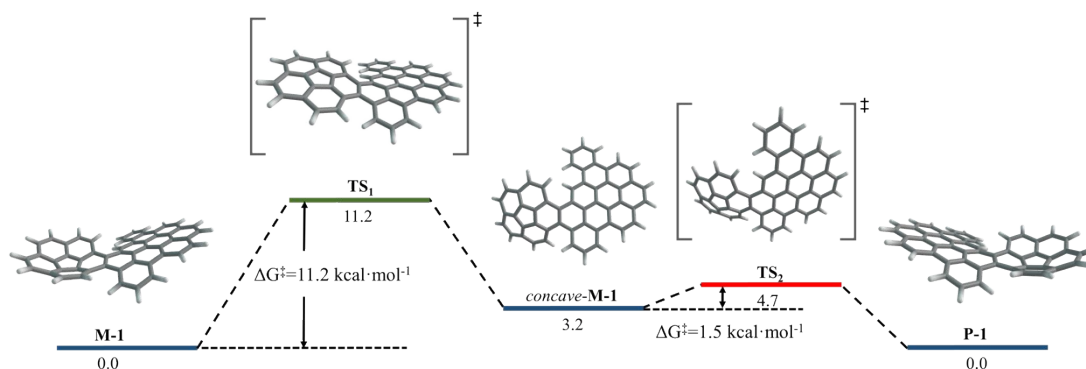

**Figure S19.** Isomerization between **M-1**, *concave-M-1* and **P-1**.

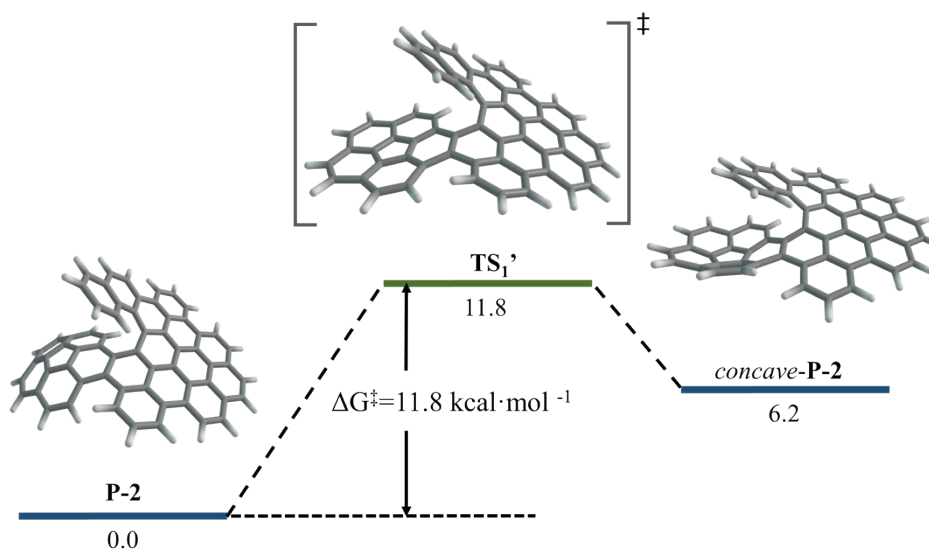

**Figure S20.** Isomerization between **P-2** and *concave-P-2*.

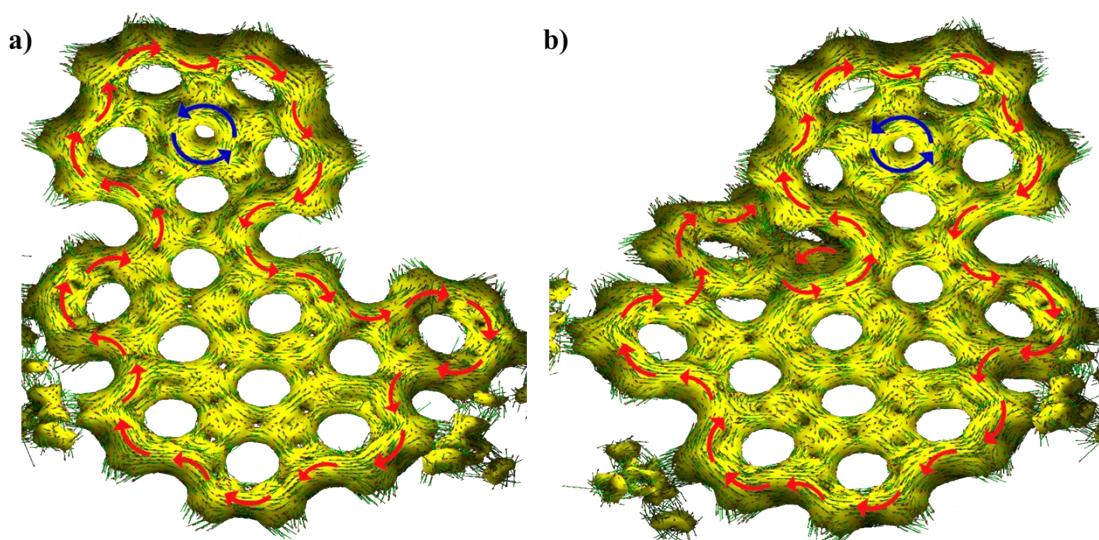

**Figure S21.** ACID plots of **1** (a) and **2** (b) (Iso value: 0.03 a.u.). The direction of external magnetic vector is orthogonal with respect to the central ring plane and points upward.

**Table S7.** NICS(1)<sub>zz</sub> and NICS(-1)<sub>zz</sub> for **1** at the optimized S0 geometry at the GIAO-B3LYP/6-311+G(2d,p) level of theory in chloroform solution. The position 1 Å above the ring center is defined as “1” and the position 1 Å under the ring center is defined as “-1”.

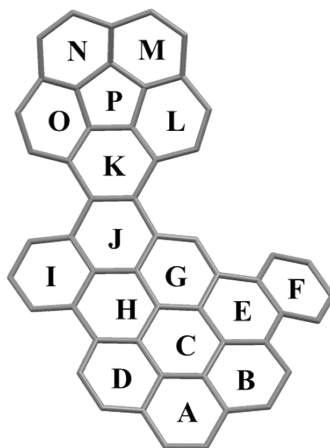

| Ring | NICS(1) <sub>zz</sub> | NICS(-1) <sub>zz</sub> | Average Value |
|------|-----------------------|------------------------|---------------|
| A    | -19.01                | -17.91                 | -18.46        |
| B    | -31.08                | -27.87                 | 29.47         |
| C    | -2.23                 | -1.28                  | -1.76         |
| D    | -30.67                | -28.28                 | -29.48        |
| E    | -4.87                 | -8.21                  | -6.54         |
| F    | -21.78                | -27.26                 | -24.52        |
| G    | -26.56                | -30.34                 | -28.45        |
| H    | -1.89                 | -6.94                  | -4.41         |
| I    | -24.37                | -32.05                 | -28.21        |
| J    | -4.59                 | -6.85                  | -5.72         |
| K    | -13.34                | -4.95                  | -9.14         |
| L    | -22.94                | -13.64                 | -18.29        |
| M    | -22.84                | -14.27                 | -18.56        |
| N    | -22.72                | -14.61                 | -18.66        |
| O    | -22.32                | -13.35                 | -17.83        |
| P    | 14.04                 | 12.66                  | 13.35         |

**Table S8.** NICS(1)<sub>zz</sub> and NICS(-1)<sub>zz</sub> for **2** at the optimized S0 geometry at the GIAO-B3LYP/6-311+G(2d,p) level of theory in chloroform solution. The position 1 Å above the ring center is defined as “1” and the position 1 Å under the ring center is defined as “-1”.

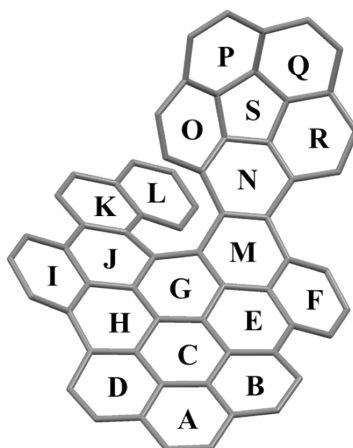

| <b>Ring</b> | <b>NICS(1)zz</b> | <b>NICS(-1)zz</b> | <b>Average Value</b> |
|-------------|------------------|-------------------|----------------------|
| A           | -18.43           | -18.63            | -18.53               |
| B           | -30.74           | -27.67            | -29.21               |
| C           | -1.64            | -1.58             | -1.61                |
| D           | -28.36           | -30.61            | -29.48               |
| E           | -0.44            | -5.73             | -3.08                |
| F           | -24.09           | -30.62            | -27.35               |
| G           | -26.96           | -28.02            | -27.49               |
| H           | -5.18            | -3.23             | -4.20                |
| I           | -28.68           | -23.80            | -26.24               |
| J           | -1.60            | -3.71             | -2.65                |
| K           | -21.96           | -23.29            | -22.63               |
| L           | -28.12           | -30.34            | -29.23               |
| M           | -4.42            | -3.10             | -3.76                |
| N           | -15.81           | -6.45             | -11.13               |
| O           | -23.32           | -15.44            | -19.38               |
| P           | -23.06           | -14.42            | -18.74               |
| Q           | -21.64           | -14.13            | -17.89               |
| R           | -21.87           | -12.71            | -17.29               |
| S           | 14.08            | 12.83             | 13.45                |

## 7 NMR, IR and Mass Spectra

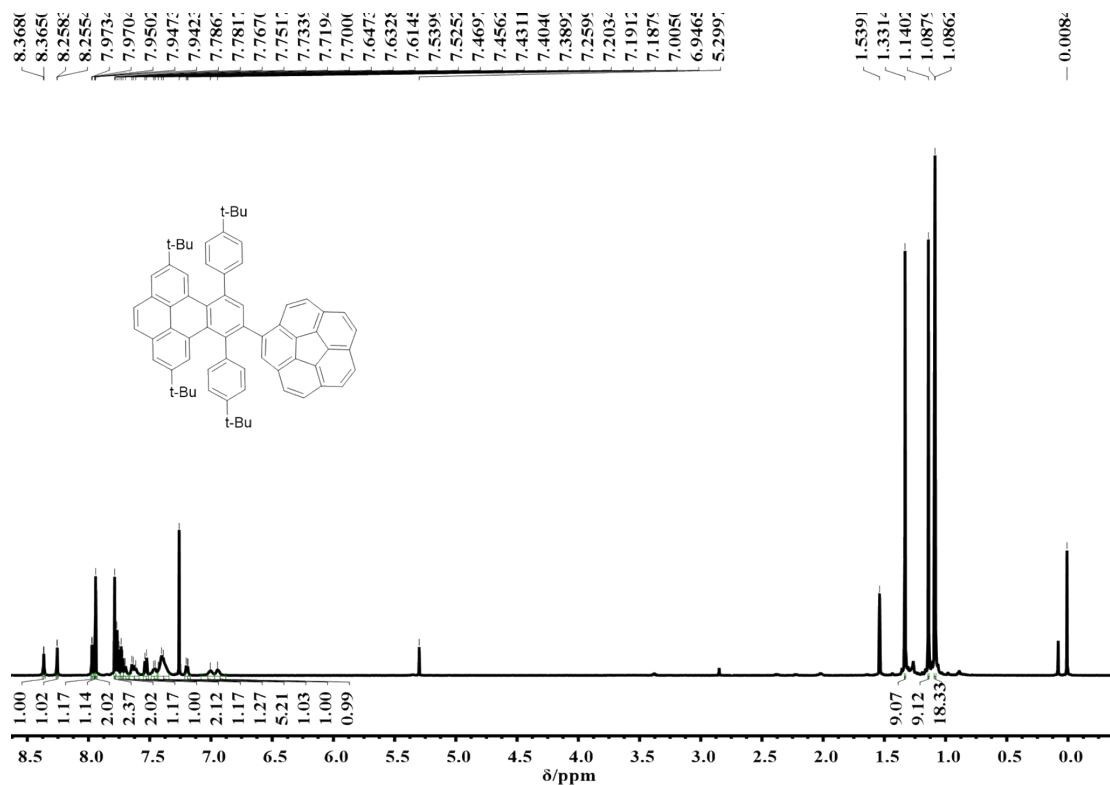

**Figure S22.** <sup>1</sup>H NMR spectrum of the compound **5** (400 MHz, CDCl<sub>3</sub>, 298 K).

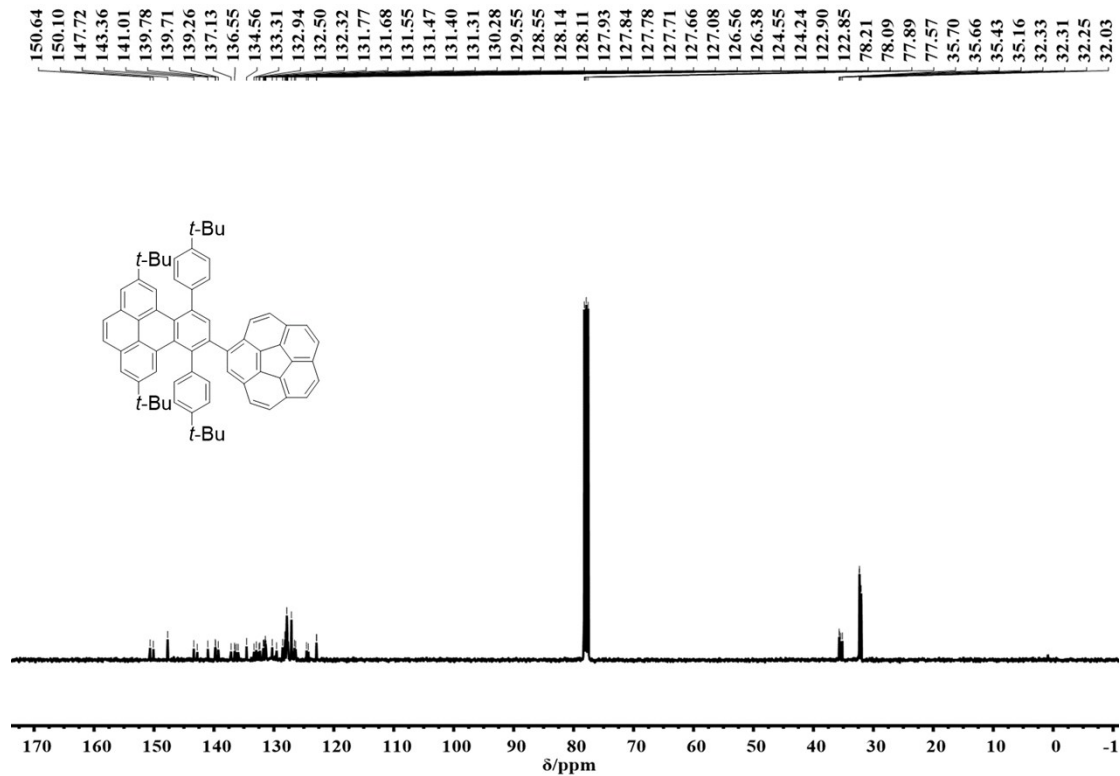

**Figure S23.** <sup>13</sup>C NMR spectrum of the compound **5** (100 MHz, CDCl<sub>3</sub>, 298 K).

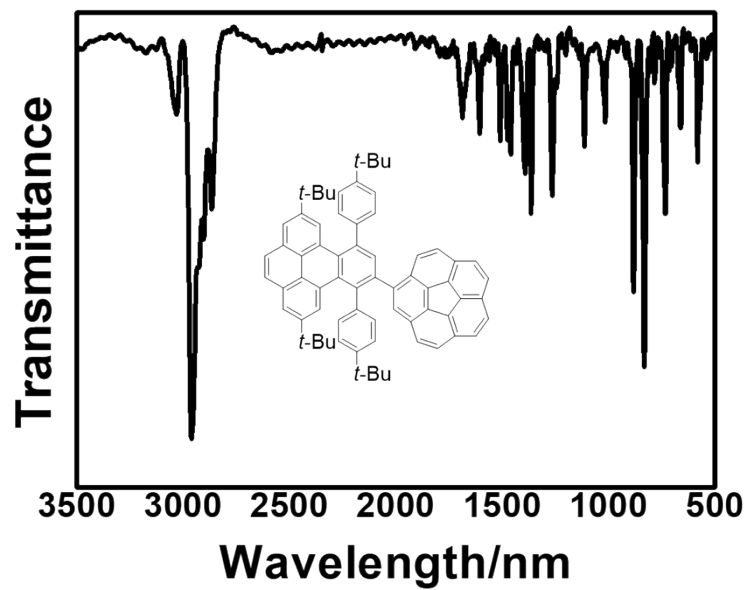

**Figure S24.** The FT-IR spectrum of **5**.

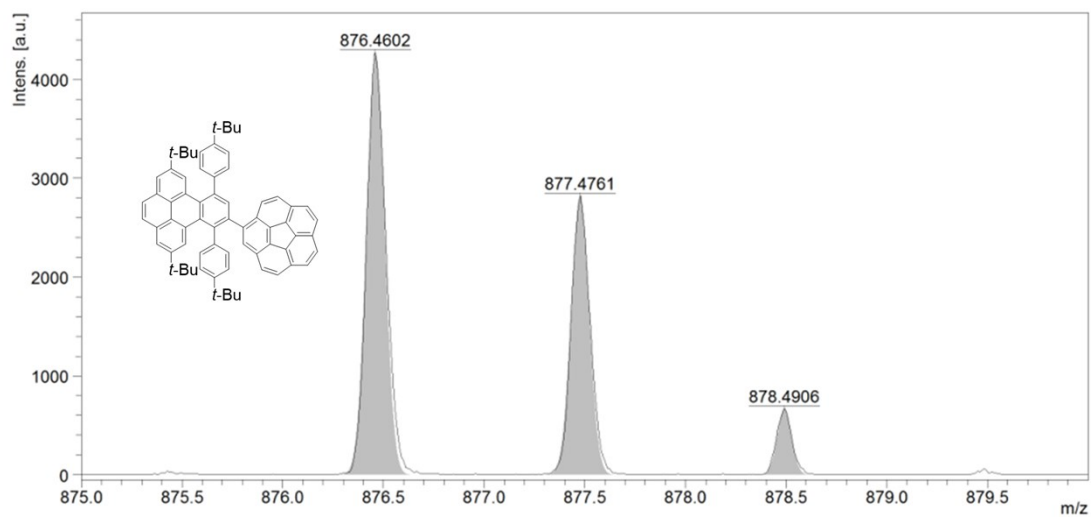

**Figure S25.** HRMS (MALDI-TOF) spectrum of the compound **5**.

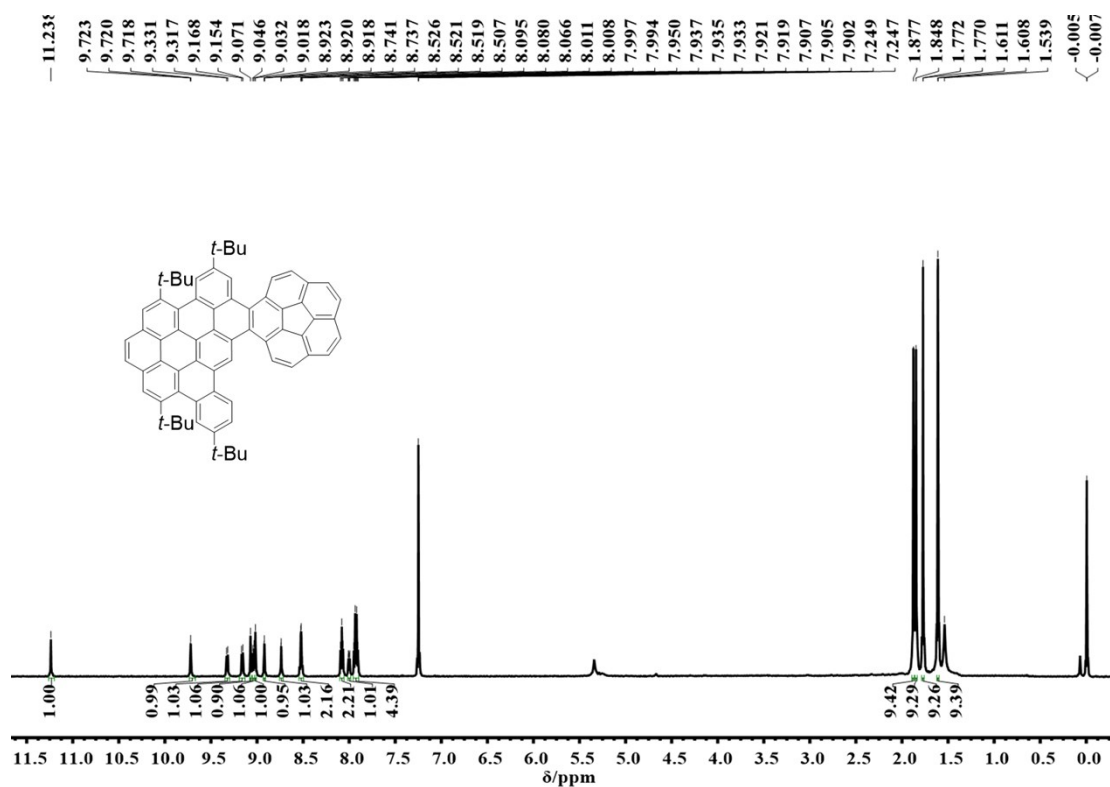

Figure S26. <sup>1</sup>H NMR spectrum of the compound 1 (400 MHz, CDCl<sub>3</sub>, 298 K).

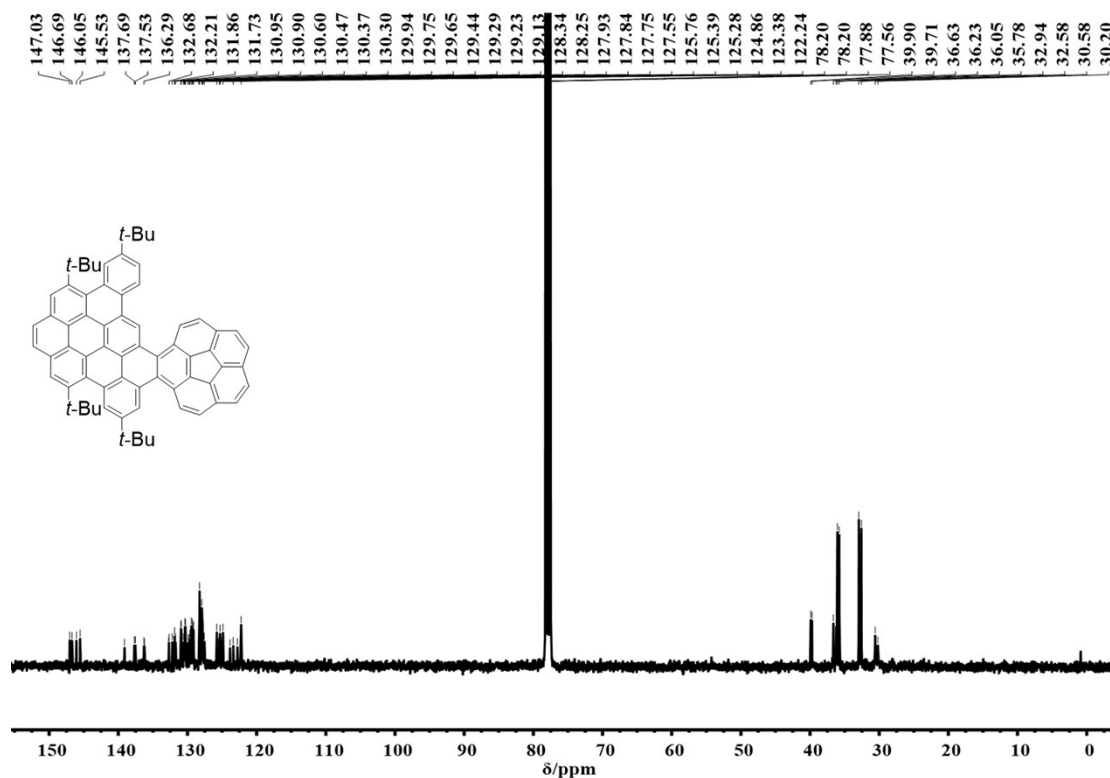

Figure S27. <sup>13</sup>C NMR spectrum of the compound 1 (100 MHz, CDCl<sub>3</sub>, 298 K).



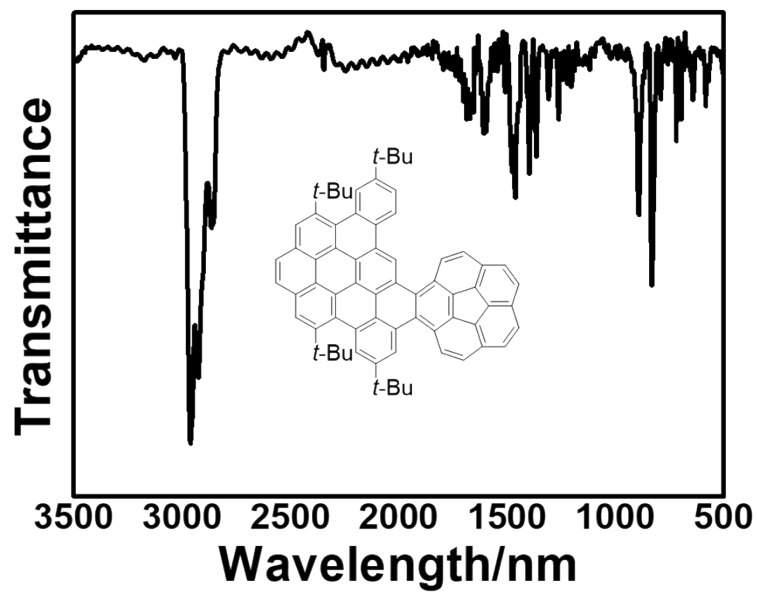

**Figure S28.** The FT-IR spectrum of **1**.

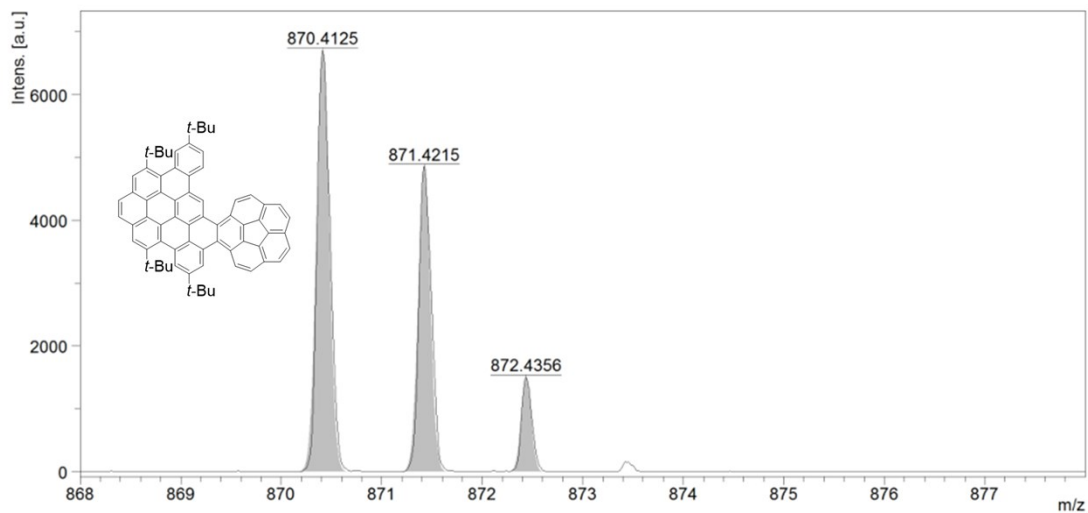

**Figure S29.** HRMS (MALDI-TOF) spectrum of the compound **1**.

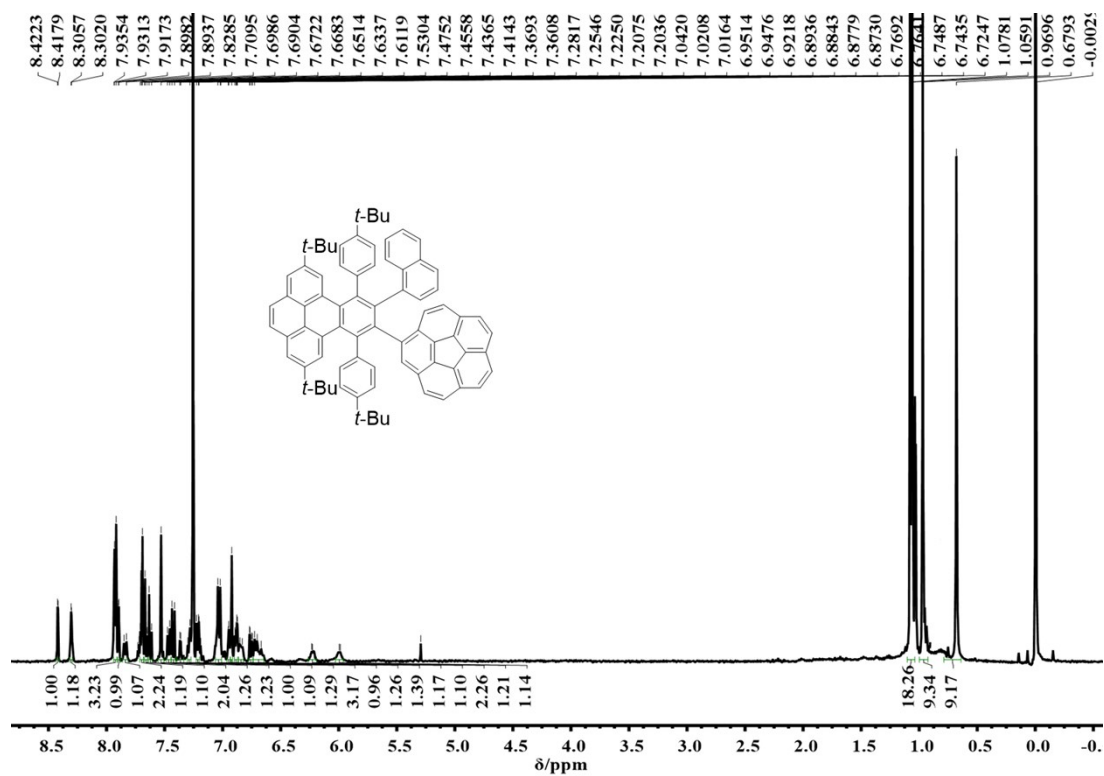

**Figure S30.**  $^1\text{H}$  NMR spectrum of the compound **8** (400 MHz,  $\text{CDCl}_3$ , 298 K).

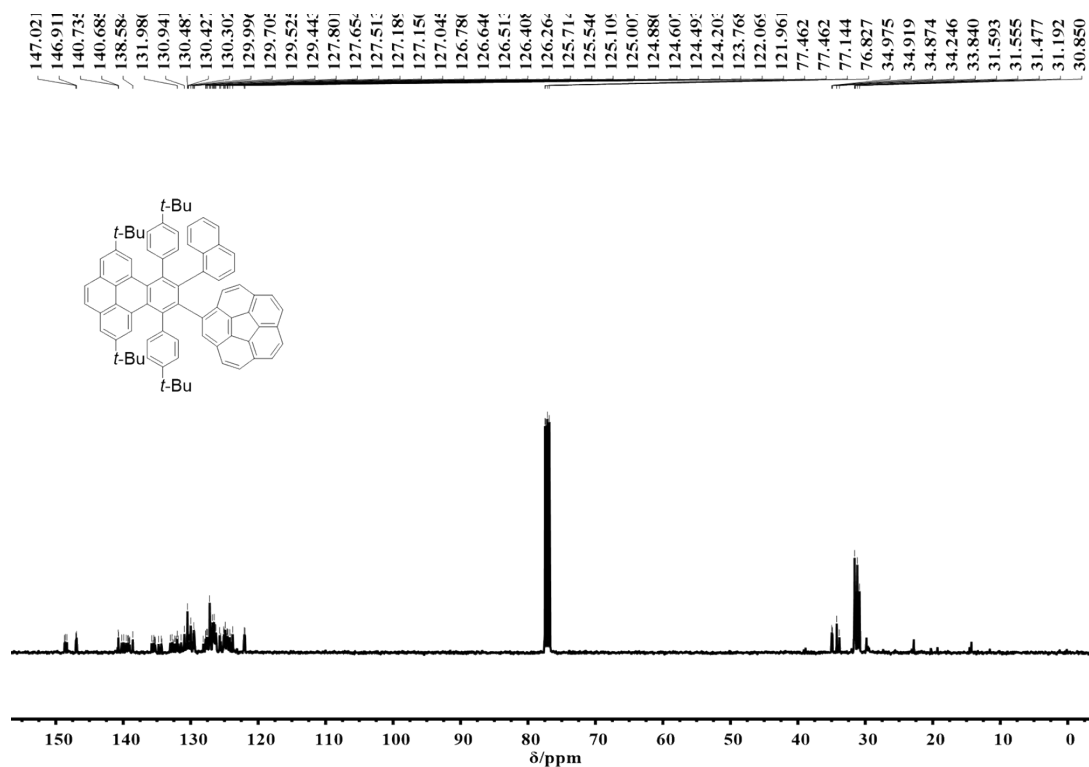

**Figure S31.**  $^{13}\text{C}$  NMR spectrum of the compound **8** (100 MHz,  $\text{CDCl}_3$ , 298 K).

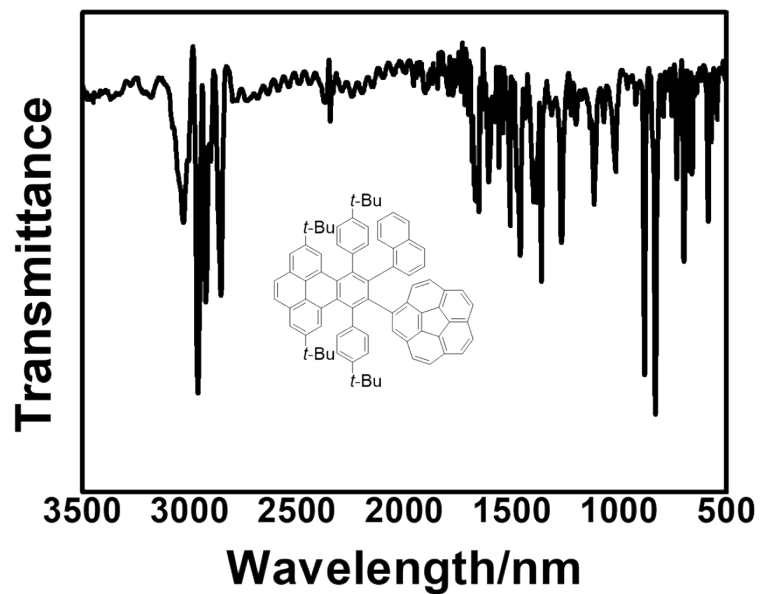

Figure S32. The FT-IR spectrum of **8**.

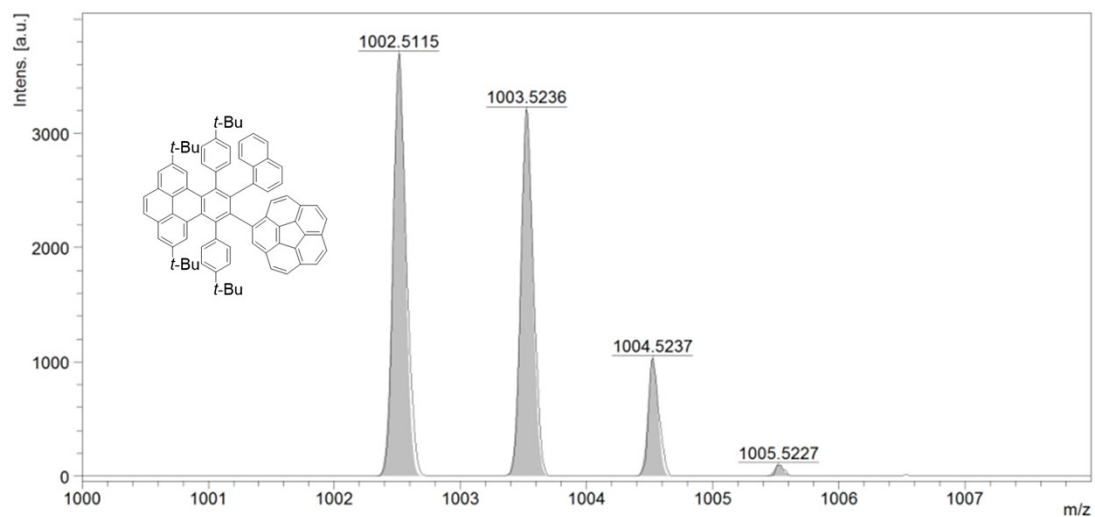

Figure S33. HRMS (MALDI-TOF) spectrum of the compound **8**.

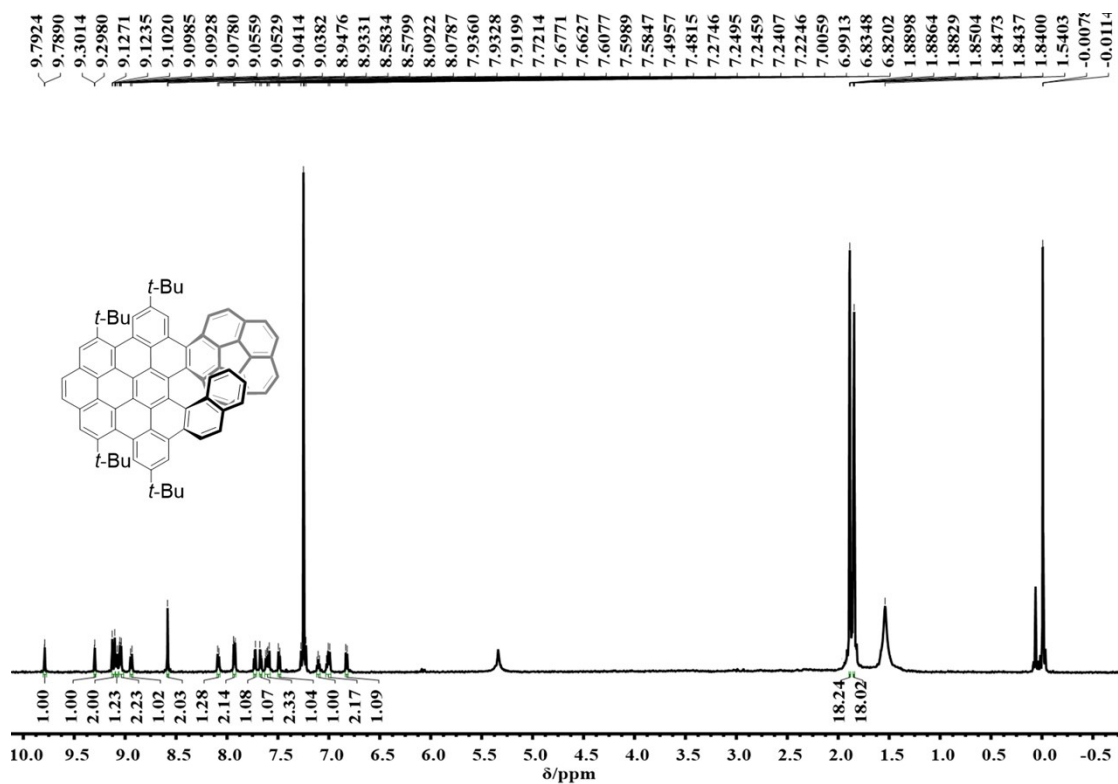

Figure S34. <sup>1</sup>H NMR spectrum of the compound 2 (400 MHz, CDCl<sub>3</sub>, 298 K).

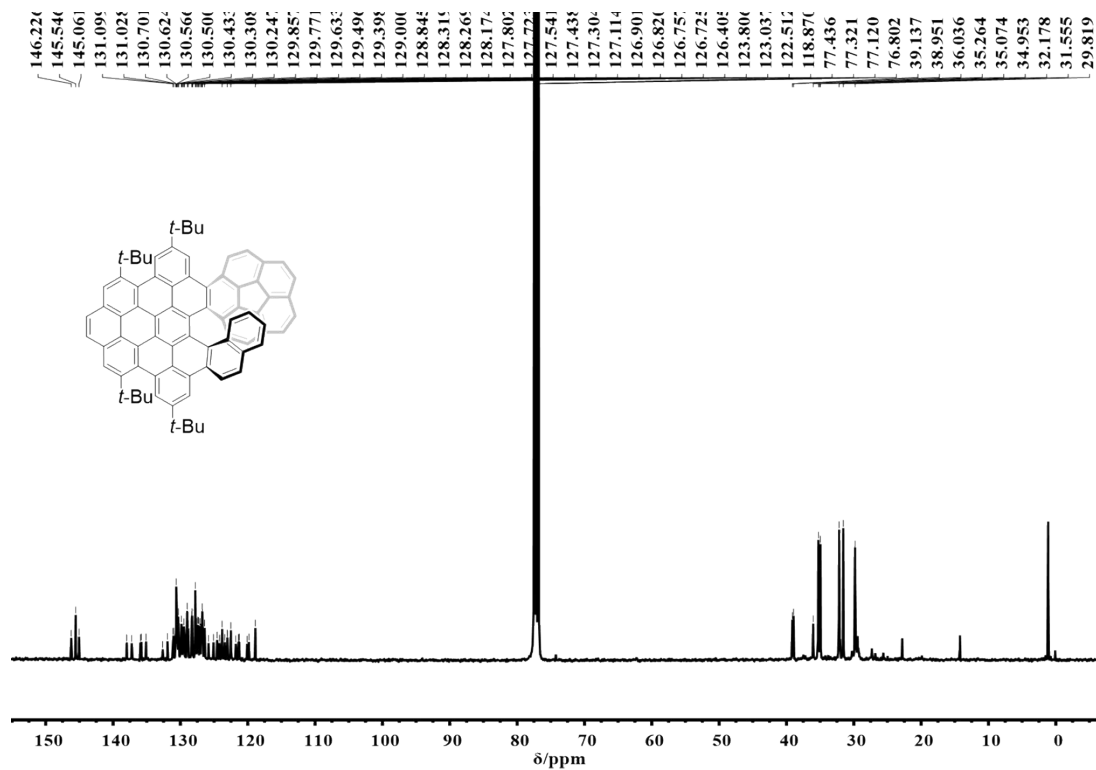

Figure S35. <sup>13</sup>C NMR spectrum of the compound 2 (100 MHz, CDCl<sub>3</sub>, 298 K).

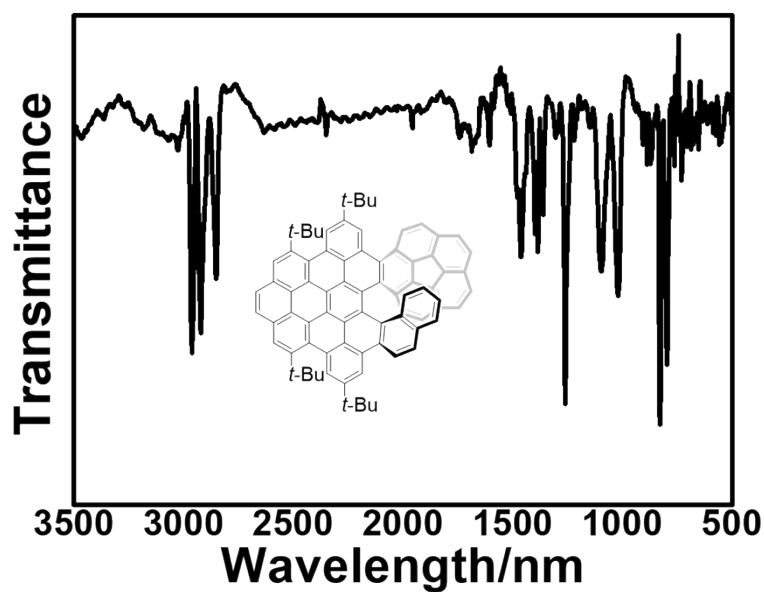

Figure S36. The FT-IR spectrum of **2**.

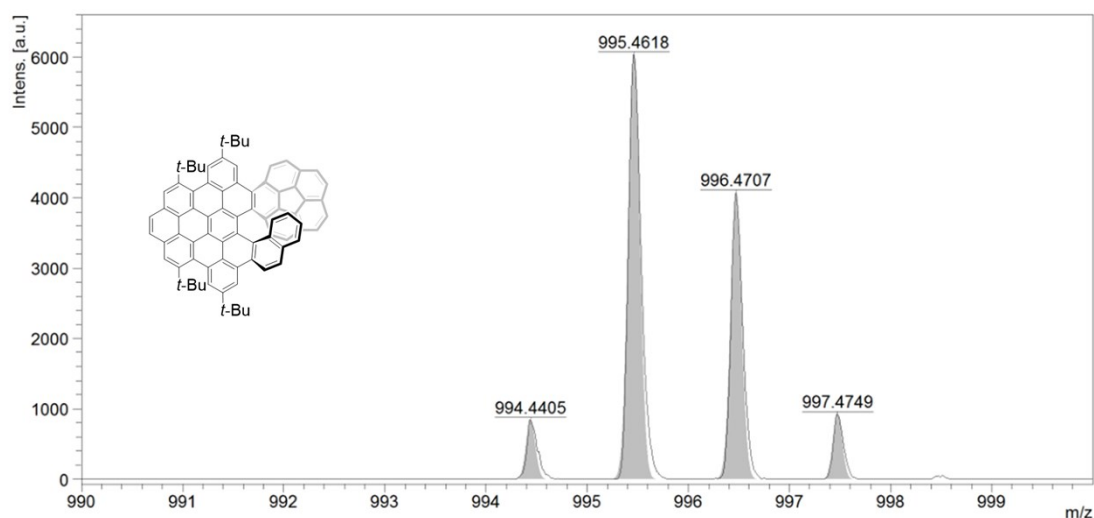

Figure S37. HRMS (MALDI-TOF) spectrum of the compound **2**.

## 8 Cartesian coordinates of optimized species

Optimized S0 geometry of **M-1**

| Center Number | Atomic Number | Atomic Type | Coordinates (Angstroms) |           |           |
|---------------|---------------|-------------|-------------------------|-----------|-----------|
|               |               |             | X                       | Y         | Z         |
| 1             | 6             | 0           | -0.335870               | -2.275410 | 0.393057  |
| 2             | 6             | 0           | -2.212124               | -0.693532 | 0.083582  |
| 3             | 6             | 0           | -4.975115               | -0.213943 | -0.452174 |
| 4             | 6             | 0           | -1.847933               | 1.706194  | 0.447444  |
| 5             | 6             | 0           | -3.099283               | -1.803335 | -0.145263 |

|    |   |   |           |           |           |
|----|---|---|-----------|-----------|-----------|
| 6  | 6 | 0 | -4.117584 | 0.881675  | -0.128074 |
| 7  | 6 | 0 | -1.242054 | -3.375652 | 0.327966  |
| 8  | 6 | 0 | -2.623225 | -3.133515 | -0.067710 |
| 9  | 6 | 0 | 1.512841  | -0.063492 | 0.437989  |
| 10 | 6 | 0 | -2.389379 | 3.058643  | 0.592978  |
| 11 | 6 | 0 | 4.252043  | -0.551177 | 0.720450  |
| 12 | 6 | 0 | 3.763052  | 0.779361  | 0.568984  |
| 13 | 6 | 0 | -2.723031 | 0.631779  | 0.127576  |
| 14 | 6 | 0 | -1.578818 | 4.144079  | 0.996712  |
| 15 | 1 | 0 | -0.532063 | 3.981844  | 1.226418  |
| 16 | 6 | 0 | -3.518517 | -4.190792 | -0.364779 |
| 17 | 6 | 0 | 0.070038  | 0.159965  | 0.426208  |
| 18 | 6 | 0 | 2.000925  | -1.394425 | 0.587609  |
| 19 | 6 | 0 | -0.483000 | 1.434522  | 0.594278  |
| 20 | 1 | 0 | 0.182761  | 2.237637  | 0.867681  |
| 21 | 6 | 0 | -6.712433 | -2.367639 | -1.057218 |
| 22 | 1 | 0 | -7.365629 | -3.205900 | -1.286951 |
| 23 | 6 | 0 | -0.824005 | -0.936961 | 0.262673  |
| 24 | 6 | 0 | -7.192917 | -1.089800 | -1.068529 |
| 25 | 1 | 0 | -8.235270 | -0.893290 | -1.307380 |
| 26 | 6 | 0 | -4.831214 | -3.951222 | -0.700070 |
| 27 | 1 | 0 | -5.491901 | -4.781636 | -0.936928 |
| 28 | 6 | 0 | -4.470775 | -1.551761 | -0.449128 |
| 29 | 6 | 0 | 1.041176  | -2.489642 | 0.710681  |
| 30 | 6 | 0 | -4.636349 | 2.198422  | -0.075646 |
| 31 | 6 | 0 | -3.764979 | 3.302602  | 0.320308  |
| 32 | 6 | 0 | -5.346091 | -2.635465 | -0.738068 |
| 33 | 6 | 0 | -6.345181 | 0.016976  | -0.756767 |
| 34 | 6 | 0 | 6.016295  | 0.794022  | 0.125572  |
| 35 | 6 | 0 | 3.451055  | -1.667057 | 0.557840  |
| 36 | 6 | 0 | 2.448135  | 1.061571  | 0.247343  |
| 37 | 6 | 0 | -0.782502 | -4.649610 | 0.698452  |
| 38 | 1 | 0 | -1.461318 | -5.494847 | 0.701917  |
| 39 | 6 | 0 | -6.826895 | 1.344314  | -0.733211 |
| 40 | 1 | 0 | -7.870378 | 1.530376  | -0.975541 |

|    |   |   |           |           |           |
|----|---|---|-----------|-----------|-----------|
| 41 | 6 | 0 | 5.638992  | -0.535913 | 0.432781  |
| 42 | 6 | 0 | 1.419326  | -3.767635 | 1.155539  |
| 43 | 1 | 0 | 2.414187  | -3.926245 | 1.549625  |
| 44 | 6 | 0 | -6.002159 | 2.393869  | -0.398838 |
| 45 | 6 | 0 | 4.853545  | 1.599738  | 0.189256  |
| 46 | 6 | 0 | -4.255571 | 4.622045  | 0.457540  |
| 47 | 1 | 0 | -5.300955 | 4.831634  | 0.264109  |
| 48 | 6 | 0 | 2.280787  | 2.334408  | -0.428351 |
| 49 | 1 | 0 | 1.299645  | 2.639661  | -0.771430 |
| 50 | 6 | 0 | 4.189354  | -2.852267 | 0.164320  |
| 51 | 1 | 0 | 3.660853  | -3.776109 | -0.035294 |
| 52 | 6 | 0 | -3.438941 | 5.666657  | 0.848851  |
| 53 | 6 | 0 | 6.333411  | -1.633037 | -0.053357 |
| 54 | 6 | 0 | 7.114387  | 1.108698  | -0.658095 |
| 55 | 6 | 0 | 4.716519  | 2.761633  | -0.554551 |
| 56 | 6 | 0 | -2.085400 | 5.424446  | 1.124133  |
| 57 | 1 | 0 | -1.435293 | 6.235176  | 1.441134  |
| 58 | 6 | 0 | 7.597791  | -1.319988 | -0.683907 |
| 59 | 1 | 0 | 8.236221  | -2.130196 | -1.029031 |
| 60 | 6 | 0 | 5.552849  | -2.840087 | -0.107990 |
| 61 | 1 | 0 | 6.007771  | -3.756523 | -0.477462 |
| 62 | 6 | 0 | 0.519166  | -4.829180 | 1.148797  |
| 63 | 6 | 0 | 3.350547  | 3.145185  | -0.791878 |
| 64 | 1 | 0 | 3.137931  | 4.041900  | -1.369800 |
| 65 | 6 | 0 | 7.971774  | -0.014785 | -0.968223 |
| 66 | 1 | 0 | 8.891608  | 0.152584  | -1.524221 |
| 67 | 6 | 0 | 7.072704  | 2.430201  | -1.246193 |
| 68 | 1 | 0 | 7.923844  | 2.785346  | -1.822966 |
| 69 | 6 | 0 | 5.929778  | 3.214917  | -1.200405 |
| 70 | 1 | 0 | 5.923712  | 4.156549  | -1.744841 |
| 71 | 1 | 0 | -3.849115 | 6.667862  | 0.947964  |
| 72 | 1 | 0 | -6.422298 | 3.392496  | -0.390486 |
| 73 | 1 | 0 | -3.162272 | -5.214926 | -0.355187 |
| 74 | 1 | 0 | 0.837091  | -5.804963 | 1.505694  |

-----  
Optimized S0 geometry of *concave-M-1*

| Center<br>Number | Atomic<br>Number | Atomic<br>Type | Coordinates (Angstroms) |           |           |
|------------------|------------------|----------------|-------------------------|-----------|-----------|
|                  |                  |                | X                       | Y         | Z         |
| 1                | 6                | 0              | -0.461117               | -2.358952 | -0.151303 |
| 2                | 6                | 0              | -2.258123               | -0.662022 | -0.065814 |
| 3                | 6                | 0              | -5.041484               | -0.012187 | 0.040505  |
| 4                | 6                | 0              | -1.687007               | 1.717370  | 0.097890  |
| 5                | 6                | 0              | -3.241056               | -1.715444 | -0.081394 |
| 6                | 6                | 0              | -4.069175               | 1.030973  | 0.110220  |
| 7                | 6                | 0              | -1.427201               | -3.409390 | -0.145315 |
| 8                | 6                | 0              | -2.845219               | -3.073278 | -0.149144 |
| 9                | 6                | 0              | 1.510826                | -0.264260 | -0.478741 |
| 10               | 6                | 0              | -2.096502               | 3.106978  | 0.310078  |
| 11               | 6                | 0              | -2.671086               | 0.694515  | 0.041144  |
| 12               | 6                | 0              | -1.151192               | 4.147041  | 0.463344  |
| 13               | 1                | 0              | -0.090845               | 3.922755  | 0.448357  |
| 14               | 6                | 0              | -3.852627               | -4.068951 | -0.207627 |
| 15               | 6                | 0              | 0.094087                | 0.050429  | -0.270171 |
| 16               | 6                | 0              | 1.929169                | -1.594978 | -0.160573 |
| 17               | 6                | 0              | -0.343988               | 1.363658  | -0.067768 |
| 18               | 1                | 0              | 0.400767                | 2.134180  | 0.017977  |
| 19               | 6                | 0              | -6.998845               | -2.054470 | -0.082593 |
| 20               | 1                | 0              | -7.735679               | -2.852450 | -0.131330 |
| 21               | 6                | 0              | -0.877614               | -0.990350 | -0.166201 |
| 22               | 6                | 0              | -7.391736               | -0.750172 | 0.001066  |
| 23               | 1                | 0              | -8.447230               | -0.490126 | 0.020672  |
| 24               | 6                | 0              | -5.189083               | -3.747997 | -0.189872 |
| 25               | 1                | 0              | -5.937866               | -4.534757 | -0.239671 |
| 26               | 6                | 0              | -4.629479               | -1.378257 | -0.049925 |
| 27               | 6                | 0              | 0.934693                | -2.660390 | -0.113293 |
| 28               | 6                | 0              | -4.482561               | 2.379937  | 0.236461  |
| 29               | 6                | 0              | -3.480121               | 3.434822  | 0.363056  |
| 30               | 6                | 0              | -5.614281               | -2.403547 | -0.106714 |
| 31               | 6                | 0              | -6.428943               | 0.302186  | 0.069112  |
| 32               | 6                | 0              | -0.974201               | -4.739138 | -0.131682 |



|    |   |   |           |           |           |
|----|---|---|-----------|-----------|-----------|
| 33 | 1 | 0 | -1.681539 | -5.559593 | -0.113191 |
| 34 | 6 | 0 | -6.812803 | 1.657444  | 0.166669  |
| 35 | 1 | 0 | -7.871356 | 1.905326  | 0.180298  |
| 36 | 6 | 0 | 1.326127  | -4.009522 | -0.152779 |
| 37 | 1 | 0 | 2.375024  | -4.263467 | -0.231213 |
| 38 | 6 | 0 | -5.871966 | 2.657408  | 0.251262  |
| 39 | 6 | 0 | -3.846043 | 4.787784  | 0.553660  |
| 40 | 1 | 0 | -4.893159 | 5.061965  | 0.603761  |
| 41 | 6 | 0 | -2.900418 | 5.786363  | 0.692686  |
| 42 | 6 | 0 | -1.536903 | 5.461607  | 0.650725  |
| 43 | 1 | 0 | -0.783755 | 6.235676  | 0.769271  |
| 44 | 6 | 0 | 0.382658  | -5.031214 | -0.154755 |
| 45 | 6 | 0 | 4.215227  | -0.962620 | -0.446205 |
| 46 | 6 | 0 | 3.799252  | 0.286089  | -0.972654 |
| 47 | 6 | 0 | 6.025565  | 0.432430  | -0.447161 |
| 48 | 6 | 0 | 3.350862  | -1.889505 | 0.088091  |
| 49 | 6 | 0 | 2.496455  | 0.745638  | -0.918128 |
| 50 | 6 | 0 | 5.580739  | -0.862775 | -0.103713 |
| 51 | 6 | 0 | 4.931243  | 1.139376  | -0.994093 |
| 52 | 6 | 0 | 2.412930  | 2.170610  | -1.225283 |
| 53 | 1 | 0 | 1.456623  | 2.629550  | -1.442060 |
| 54 | 6 | 0 | 4.001207  | -2.819652 | 0.994060  |
| 55 | 1 | 0 | 3.414173  | -3.579338 | 1.499009  |
| 56 | 6 | 0 | 6.187890  | -1.644888 | 0.861786  |
| 57 | 6 | 0 | 7.111699  | 1.047801  | 0.148566  |
| 58 | 6 | 0 | 4.858917  | 2.519286  | -1.006307 |
| 59 | 6 | 0 | 7.436709  | -1.100719 | 1.358036  |
| 60 | 1 | 0 | 8.017655  | -1.669086 | 2.080985  |
| 61 | 6 | 0 | 5.340277  | -2.701118 | 1.360879  |
| 62 | 1 | 0 | 5.721654  | -3.383765 | 2.117039  |
| 63 | 6 | 0 | 3.522813  | 3.007527  | -1.256767 |
| 64 | 1 | 0 | 3.355199  | 4.067408  | -1.435223 |
| 65 | 6 | 0 | 7.874553  | 0.174372  | 1.019113  |
| 66 | 1 | 0 | 8.780825  | 0.548827  | 1.489976  |
| 67 | 6 | 0 | 7.138901  | 2.485255  | -0.022866 |

|    |   |   |           |           |           |
|----|---|---|-----------|-----------|-----------|
| 68 | 1 | 0 | 7.983563  | 3.054486  | 0.358841  |
| 69 | 6 | 0 | 6.069856  | 3.183475  | -0.575202 |
| 70 | 1 | 0 | 6.124354  | 4.269392  | -0.605675 |
| 71 | 1 | 0 | 0.711412  | -6.066423 | -0.184881 |
| 72 | 1 | 0 | -3.576065 | -5.114336 | -0.277321 |
| 73 | 1 | 0 | -6.218983 | 3.680910  | 0.327390  |
| 74 | 1 | 0 | -3.216060 | 6.815387  | 0.840795  |

-----

Optimized S0 geometry of **P-1**

-----

| Center<br>Number | Atomic<br>Number | Atomic<br>Type | Coordinates (Angstroms) |           |           |
|------------------|------------------|----------------|-------------------------|-----------|-----------|
|                  |                  |                | X                       | Y         | Z         |
| 1                | 6                | 0              | -0.335824               | -2.275365 | -0.393005 |
| 2                | 6                | 0              | -2.212073               | -0.693497 | -0.083451 |
| 3                | 6                | 0              | -4.975113               | -0.213997 | 0.452156  |
| 4                | 6                | 0              | -1.847882               | 1.706261  | -0.447158 |
| 5                | 6                | 0              | -3.099223               | -1.803319 | 0.145361  |
| 6                | 6                | 0              | -4.117615               | 0.881635  | 0.127979  |
| 7                | 6                | 0              | -1.242029               | -3.375582 | -0.328092 |
| 8                | 6                | 0              | -2.623154               | -3.133485 | 0.067823  |
| 9                | 6                | 0              | 1.512861                | -0.063473 | -0.437799 |
| 10               | 6                | 0              | -2.389339               | 3.058734  | -0.592668 |
| 11               | 6                | 0              | -2.723001               | 0.631806  | -0.127457 |
| 12               | 6                | 0              | -1.578645               | 4.144327  | -0.995705 |
| 13               | 1                | 0              | -0.531648               | 3.982319  | -1.224470 |
| 14               | 6                | 0              | -3.518319               | -4.190794 | 0.365175  |
| 15               | 6                | 0              | 0.070078                | 0.160006  | -0.425972 |
| 16               | 6                | 0              | 2.000939                | -1.394397 | -0.587498 |
| 17               | 6                | 0              | -0.482957               | 1.434565  | -0.594036 |
| 18               | 1                | 0              | 0.182825                | 2.237628  | -0.867604 |
| 19               | 6                | 0              | -6.712295               | -2.367715 | 1.057461  |
| 20               | 1                | 0              | -7.365464               | -3.205962 | 1.287323  |
| 21               | 6                | 0              | -0.823951               | -0.936911 | -0.262476 |
| 22               | 6                | 0              | -7.192858               | -1.089906 | 1.068564  |
| 23               | 1                | 0              | -8.235235               | -0.893462 | 1.307364  |

|    |   |   |           |           |           |
|----|---|---|-----------|-----------|-----------|
| 24 | 6 | 0 | -4.830994 | -3.951258 | 0.700564  |
| 25 | 1 | 0 | -5.491608 | -4.781652 | 0.937683  |
| 26 | 6 | 0 | -4.470706 | -1.551790 | 0.449275  |
| 27 | 6 | 0 | 1.041199  | -2.489601 | -0.710708 |
| 28 | 6 | 0 | -4.636480 | 2.198326  | 0.075245  |
| 29 | 6 | 0 | -3.765116 | 3.302543  | -0.320709 |
| 30 | 6 | 0 | -5.345941 | -2.635523 | 0.738361  |
| 31 | 6 | 0 | -6.345201 | 0.016883  | 0.756665  |
| 32 | 6 | 0 | -0.782585 | -4.649462 | -0.698992 |
| 33 | 1 | 0 | -1.461552 | -5.494580 | -0.702813 |
| 34 | 6 | 0 | -6.827007 | 1.344183  | 0.732904  |
| 35 | 1 | 0 | -7.870494 | 1.530186  | 0.975258  |
| 36 | 6 | 0 | 1.419282  | -3.767504 | -1.155865 |
| 37 | 1 | 0 | 2.414161  | -3.926097 | -1.549919 |
| 38 | 6 | 0 | -6.002339 | 2.393723  | 0.398376  |
| 39 | 6 | 0 | -4.255840 | 4.621889  | -0.458490 |
| 40 | 1 | 0 | -5.301414 | 4.831309  | -0.265937 |
| 41 | 6 | 0 | -3.439115 | 5.666601  | -0.849357 |
| 42 | 6 | 0 | -2.085327 | 5.424621  | -1.123511 |
| 43 | 1 | 0 | -1.435094 | 6.235472  | -1.439947 |
| 44 | 6 | 0 | 0.519058  | -4.829001 | -1.149414 |
| 45 | 6 | 0 | 4.252062  | -0.551101 | -0.720785 |
| 46 | 6 | 0 | 3.763067  | 0.779446  | -0.569246 |
| 47 | 6 | 0 | 6.016361  | 0.794101  | -0.125931 |
| 48 | 6 | 0 | 3.451067  | -1.666958 | -0.557920 |
| 49 | 6 | 0 | 2.448205  | 1.061531  | -0.247236 |
| 50 | 6 | 0 | 5.639037  | -0.535846 | -0.433181 |
| 51 | 6 | 0 | 4.853597  | 1.599832  | -0.189566 |
| 52 | 6 | 0 | 2.280856  | 2.334209  | 0.428741  |
| 53 | 1 | 0 | 1.299750  | 2.639248  | 0.772083  |
| 54 | 6 | 0 | 4.189288  | -2.852158 | -0.164293 |
| 55 | 1 | 0 | 3.660703  | -3.775903 | 0.035518  |
| 56 | 6 | 0 | 6.333342  | -1.632965 | 0.053150  |
| 57 | 6 | 0 | 7.114319  | 1.108657  | 0.657992  |
| 58 | 6 | 0 | 4.716554  | 2.761541  | 0.554559  |

|    |   |   |           |           |           |
|----|---|---|-----------|-----------|-----------|
| 59 | 6 | 0 | 7.597657  | -1.320006 | 0.683885  |
| 60 | 1 | 0 | 8.235939  | -2.130283 | 1.029120  |
| 61 | 6 | 0 | 5.552780  | -2.839988 | 0.107993  |
| 62 | 1 | 0 | 6.007717  | -3.756337 | 0.477651  |
| 63 | 6 | 0 | 3.350607  | 3.144991  | 0.792201  |
| 64 | 1 | 0 | 3.138101  | 4.041555  | 1.370392  |
| 65 | 6 | 0 | 7.971638  | -0.014840 | 0.968279  |
| 66 | 1 | 0 | 8.891360  | 0.152551  | 1.524453  |
| 67 | 6 | 0 | 7.072626  | 2.430008  | 1.246382  |
| 68 | 1 | 0 | 7.923697  | 2.784960  | 1.823373  |
| 69 | 6 | 0 | 5.929717  | 3.214744  | 1.200604  |
| 70 | 1 | 0 | 5.923518  | 4.156227  | 1.745293  |
| 71 | 1 | 0 | 0.836925  | -5.804686 | -1.506624 |
| 72 | 1 | 0 | -3.161912 | -5.214873 | 0.355762  |
| 73 | 1 | 0 | -3.849397 | 6.667714  | -0.948951 |
| 74 | 1 | 0 | -6.422491 | 3.392334  | 0.389934  |

-----

Optimized S0 geometry of TS<sub>1</sub>

-----

| Center<br>Number | Atomic<br>Number | Atomic<br>Type | Coordinates (Angstroms) |           |           |
|------------------|------------------|----------------|-------------------------|-----------|-----------|
|                  |                  |                | X                       | Y         | Z         |
| 1                | 6                | 0              | -0.404012               | -2.296212 | 0.290177  |
| 2                | 6                | 0              | -2.263566               | -0.686704 | 0.045303  |
| 3                | 6                | 0              | -5.038821               | -0.159868 | -0.365442 |
| 4                | 6                | 0              | -1.839850               | 1.701885  | 0.388413  |
| 5                | 6                | 0              | -3.180439               | -1.780754 | -0.131398 |
| 6                | 6                | 0              | -4.148905               | 0.920330  | -0.080264 |
| 7                | 6                | 0              | -1.335464               | -3.377715 | 0.292784  |
| 8                | 6                | 0              | -2.725454               | -3.117567 | -0.057682 |
| 9                | 6                | 0              | 1.489076                | -0.118097 | 0.122315  |
| 10               | 6                | 0              | -2.351574               | 3.060526  | 0.575859  |
| 11               | 6                | 0              | -2.749036               | 0.645891  | 0.110159  |
| 12               | 6                | 0              | -1.507593               | 4.125887  | 0.963680  |
| 13               | 1                | 0              | -0.457182               | 3.940801  | 1.157488  |
| 14               | 6                | 0              | -3.650100               | -4.161468 | -0.308329 |

|    |   |   |           |           |           |
|----|---|---|-----------|-----------|-----------|
| 15 | 6 | 0 | 0.051355  | 0.125775  | 0.246564  |
| 16 | 6 | 0 | 1.969626  | -1.471335 | 0.307342  |
| 17 | 6 | 0 | -0.472983 | 1.407475  | 0.449267  |
| 18 | 1 | 0 | 0.214090  | 2.198825  | 0.692051  |
| 19 | 6 | 0 | -6.837596 | -2.284171 | -0.885663 |
| 20 | 1 | 0 | -7.515215 | -3.111137 | -1.083442 |
| 21 | 6 | 0 | -0.872506 | -0.953524 | 0.152885  |
| 22 | 6 | 0 | -7.295256 | -0.997683 | -0.883421 |
| 23 | 1 | 0 | -8.343129 | -0.783928 | -1.079516 |
| 24 | 6 | 0 | -4.970821 | -3.900613 | -0.594232 |
| 25 | 1 | 0 | -5.654779 | -4.720897 | -0.798055 |
| 26 | 6 | 0 | -4.558736 | -1.506341 | -0.377871 |
| 27 | 6 | 0 | 0.981627  | -2.525333 | 0.559314  |
| 28 | 6 | 0 | -4.640714 | 2.245793  | -0.003673 |
| 29 | 6 | 0 | -3.733220 | 3.330990  | 0.363589  |
| 30 | 6 | 0 | -5.464140 | -2.576034 | -0.621915 |
| 31 | 6 | 0 | -6.416095 | 0.095310  | -0.611764 |
| 32 | 6 | 0 | -0.893376 | -4.648151 | 0.692303  |
| 33 | 1 | 0 | -1.590007 | -5.476957 | 0.748102  |
| 34 | 6 | 0 | -6.871722 | 1.431594  | -0.570459 |
| 35 | 1 | 0 | -7.920704 | 1.636683  | -0.769869 |
| 36 | 6 | 0 | 1.338356  | -3.794141 | 1.045532  |
| 37 | 1 | 0 | 2.331668  | -3.963652 | 1.428982  |
| 38 | 6 | 0 | -6.014975 | 2.466243  | -0.270536 |
| 39 | 6 | 0 | -4.194406 | 4.656717  | 0.536256  |
| 40 | 1 | 0 | -5.243318 | 4.885787  | 0.389321  |
| 41 | 6 | 0 | -3.344518 | 5.682261  | 0.907053  |
| 42 | 6 | 0 | -1.986042 | 5.413023  | 1.127373  |
| 43 | 1 | 0 | -1.310586 | 6.207855  | 1.431407  |
| 44 | 6 | 0 | 0.416633  | -4.834757 | 1.112258  |
| 45 | 6 | 0 | 4.172605  | -0.719400 | -0.143664 |
| 46 | 6 | 0 | 3.700762  | 0.588493  | -0.340521 |
| 47 | 6 | 0 | 5.964300  | 0.635115  | -0.469604 |
| 48 | 6 | 0 | 3.416539  | -1.809554 | 0.190286  |
| 49 | 6 | 0 | 2.403710  | 1.003255  | -0.223480 |

|    |   |   |           |           |           |
|----|---|---|-----------|-----------|-----------|
| 50 | 6 | 0 | 5.572412  | -0.685015 | -0.232988 |
| 51 | 6 | 0 | 4.811044  | 1.418972  | -0.552020 |
| 52 | 6 | 0 | 2.318150  | 2.448409  | -0.477449 |
| 53 | 1 | 0 | 1.357816  | 2.939293  | -0.563831 |
| 54 | 6 | 0 | 4.286925  | -2.985077 | 0.340581  |
| 55 | 1 | 0 | 3.868377  | -3.971174 | 0.485198  |
| 56 | 6 | 0 | 6.428641  | -1.722971 | 0.023414  |
| 57 | 6 | 0 | 7.252362  | 1.104967  | -0.450476 |
| 58 | 6 | 0 | 4.795040  | 2.784559  | -0.658722 |
| 59 | 6 | 0 | 7.821982  | -1.297728 | -0.000315 |
| 60 | 1 | 0 | 8.610127  | -2.025783 | 0.177212  |
| 61 | 6 | 0 | 5.685837  | -2.941782 | 0.283434  |
| 62 | 1 | 0 | 6.212526  | -3.881043 | 0.436336  |
| 63 | 6 | 0 | 3.430623  | 3.279883  | -0.659858 |
| 64 | 1 | 0 | 3.233216  | 4.337604  | -0.818684 |
| 65 | 6 | 0 | 8.209088  | 0.030235  | -0.218092 |
| 66 | 1 | 0 | 9.273706  | 0.251341  | -0.193625 |
| 67 | 6 | 0 | 7.294131  | 2.554155  | -0.600901 |
| 68 | 1 | 0 | 8.252979  | 3.067100  | -0.621037 |
| 69 | 6 | 0 | 6.140617  | 3.341540  | -0.703080 |
| 70 | 1 | 0 | 6.275640  | 4.416415  | -0.798920 |
| 71 | 1 | 0 | 0.727558  | -5.800628 | 1.500870  |
| 72 | 1 | 0 | -3.310967 | -5.191594 | -0.303441 |
| 73 | 1 | 0 | -6.416138 | 3.472431  | -0.245231 |
| 74 | 1 | 0 | -3.732793 | 6.688932  | 1.034755  |

-----

Optimized S0 geometry of **TS<sub>2</sub>**

-----

| Center<br>Number | Atomic<br>Number | Atomic<br>Type | Coordinates (Angstroms) |           |           |
|------------------|------------------|----------------|-------------------------|-----------|-----------|
|                  |                  |                | X                       | Y         | Z         |
| 1                | 6                | 0              | -0.405288               | -2.275346 | -0.352154 |
| 2                | 6                | 0              | -2.256089               | -0.662322 | -0.110297 |
| 3                | 6                | 0              | -5.052983               | -0.154457 | 0.280356  |
| 4                | 6                | 0              | -1.826488               | 1.745656  | -0.177232 |
| 5                | 6                | 0              | -3.185273               | -1.762877 | -0.013207 |

|    |   |   |           |           |           |
|----|---|---|-----------|-----------|-----------|
| 6  | 6 | 0 | -4.145859 | 0.939176  | 0.148518  |
| 7  | 6 | 0 | -1.328105 | -3.364561 | -0.359876 |
| 8  | 6 | 0 | -2.739198 | -3.100450 | -0.129257 |
| 9  | 6 | 0 | 1.524143  | -0.078792 | -0.486178 |
| 10 | 6 | 0 | -2.311720 | 3.128021  | -0.135108 |
| 11 | 6 | 0 | -2.744133 | 0.671949  | -0.049538 |
| 12 | 6 | 0 | -1.444224 | 4.231988  | -0.300504 |
| 13 | 1 | 0 | -0.388186 | 4.070482  | -0.479233 |
| 14 | 6 | 0 | -3.684499 | -4.149412 | -0.005102 |
| 15 | 6 | 0 | 0.071014  | 0.163271  | -0.379514 |
| 16 | 6 | 0 | 1.954721  | -1.439593 | -0.369511 |
| 17 | 6 | 0 | -0.469109 | 1.452503  | -0.335845 |
| 18 | 1 | 0 | 0.199565  | 2.282683  | -0.383034 |
| 19 | 6 | 0 | -6.883877 | -2.298935 | 0.524748  |
| 20 | 1 | 0 | -7.570776 | -3.136821 | 0.615203  |
| 21 | 6 | 0 | -0.861402 | -0.922276 | -0.262954 |
| 22 | 6 | 0 | -7.337566 | -1.015279 | 0.614836  |
| 23 | 1 | 0 | -8.392627 | -0.810093 | 0.778528  |
| 24 | 6 | 0 | -5.017481 | -3.898334 | 0.210909  |
| 25 | 1 | 0 | -5.718529 | -4.723424 | 0.310206  |
| 26 | 6 | 0 | -4.575546 | -1.498357 | 0.192156  |
| 27 | 6 | 0 | 0.990518  | -2.525877 | -0.474077 |
| 28 | 6 | 0 | -4.625633 | 2.269808  | 0.224979  |
| 29 | 6 | 0 | -3.695447 | 3.384845  | 0.072544  |
| 30 | 6 | 0 | -5.499627 | -2.574615 | 0.309096  |
| 31 | 6 | 0 | -6.439312 | 0.087314  | 0.492129  |
| 32 | 6 | 0 | -0.843409 | -4.659833 | -0.604358 |
| 33 | 1 | 0 | -1.525989 | -5.499788 | -0.652063 |
| 34 | 6 | 0 | -6.887773 | 1.423267  | 0.573339  |
| 35 | 1 | 0 | -7.945100 | 1.614994  | 0.738913  |
| 36 | 6 | 0 | 1.413313  | -3.833355 | -0.772570 |
| 37 | 1 | 0 | 2.454637  | -4.022652 | -0.997682 |
| 38 | 6 | 0 | -6.010579 | 2.474252  | 0.443607  |
| 39 | 6 | 0 | -4.135565 | 4.728472  | 0.117843  |
| 40 | 1 | 0 | -5.184847 | 4.947768  | 0.274588  |

|    |   |   |           |           |           |
|----|---|---|-----------|-----------|-----------|
| 41 | 6 | 0 | -3.262310 | 5.788087  | -0.038336 |
| 42 | 6 | 0 | -1.900014 | 5.536311  | -0.253269 |
| 43 | 1 | 0 | -1.202855 | 6.358941  | -0.386092 |
| 44 | 6 | 0 | 0.505398  | -4.883234 | -0.842550 |
| 45 | 6 | 0 | 4.249819  | -0.796582 | -0.509028 |
| 46 | 6 | 0 | 3.850747  | 0.540976  | -0.770293 |
| 47 | 6 | 0 | 6.090049  | 0.526505  | -0.236738 |
| 48 | 6 | 0 | 3.368459  | -1.786517 | -0.153104 |
| 49 | 6 | 0 | 2.547369  | 1.000812  | -0.644719 |
| 50 | 6 | 0 | 5.617583  | -0.799876 | -0.159824 |
| 51 | 6 | 0 | 5.005686  | 1.352383  | -0.612076 |
| 52 | 6 | 0 | 2.523434  | 2.461584  | -0.578686 |
| 53 | 1 | 0 | 1.601991  | 3.018101  | -0.629203 |
| 54 | 6 | 0 | 3.990614  | -2.881684 | 0.569208  |
| 55 | 1 | 0 | 3.380756  | -3.702146 | 0.930848  |
| 56 | 6 | 0 | 6.207247  | -1.768893 | 0.632516  |
| 57 | 6 | 0 | 7.196812  | 0.981697  | 0.457729  |
| 58 | 6 | 0 | 4.975743  | 2.704319  | -0.329860 |
| 59 | 6 | 0 | 7.473388  | -1.368891 | 1.211926  |
| 60 | 1 | 0 | 8.040759  | -2.084659 | 1.802556  |
| 61 | 6 | 0 | 5.332941  | -2.874290 | 0.937497  |
| 62 | 1 | 0 | 5.696983  | -3.694113 | 1.552736  |
| 63 | 6 | 0 | 3.652812  | 3.258177  | -0.428212 |
| 64 | 1 | 0 | 3.501909  | 4.330581  | -0.325906 |
| 65 | 6 | 0 | 7.944279  | -0.064544 | 1.125746  |
| 66 | 1 | 0 | 8.863242  | 0.187898  | 1.650151  |
| 67 | 6 | 0 | 7.262937  | 2.421806  | 0.586566  |
| 68 | 1 | 0 | 8.126687  | 2.878297  | 1.064754  |
| 69 | 6 | 0 | 6.206336  | 3.240940  | 0.209211  |
| 70 | 1 | 0 | 6.283351  | 4.308243  | 0.403769  |
| 71 | 1 | 0 | 0.853778  | -5.882286 | -1.089556 |
| 72 | 1 | 0 | -3.356973 | -5.180623 | -0.062159 |
| 73 | 1 | 0 | -3.633785 | 6.808322  | 0.000631  |
| 74 | 1 | 0 | -6.405109 | 3.480660  | 0.513168  |



Optimized S0 geometry of **P-2**

| Center<br>Number | Atomic<br>Number | Atomic<br>Type | Coordinates (Angstroms) |           |           |
|------------------|------------------|----------------|-------------------------|-----------|-----------|
|                  |                  |                | X                       | Y         | Z         |
| 1                | 6                | 0              | 4.774063                | -1.802844 | -0.408872 |
| 2                | 6                | 0              | 2.001260                | 1.404159  | 0.091205  |
| 3                | 6                | 0              | 0.692920                | -2.600551 | 0.591592  |
| 4                | 6                | 0              | 3.430311                | -2.076056 | -0.015058 |
| 5                | 6                | 0              | 0.682894                | 1.132064  | 0.553114  |
| 6                | 6                | 0              | 4.248570                | 0.612903  | -0.595809 |
| 7                | 6                | 0              | 0.176869                | -0.197420 | 0.382353  |
| 8                | 6                | 0              | 2.489698                | -0.993534 | 0.058765  |
| 9                | 6                | 0              | 1.657157                | -3.644857 | 0.719383  |
| 10               | 6                | 0              | 3.034727                | -3.395171 | 0.307842  |
| 11               | 6                | 0              | 5.716407                | -2.863903 | -0.504042 |
| 12               | 6                | 0              | -3.081934               | -2.242013 | 0.269556  |
| 13               | 6                | 0              | 1.117012                | -1.261012 | 0.305749  |
| 14               | 6                | 0              | -0.055210               | 2.228595  | 1.180806  |
| 15               | 6                | 0              | -2.174141               | 0.471770  | -0.330590 |
| 16               | 6                | 0              | -0.683670               | -2.850212 | 0.872620  |
| 17               | 6                | 0              | 7.052841                | -2.575481 | -0.919855 |
| 18               | 1                | 0              | 7.762493                | -3.396030 | -0.992282 |
| 19               | 6                | 0              | -4.534157               | 0.781790  | -0.956779 |
| 20               | 6                | 0              | -3.508599               | 0.134961  | -0.224889 |
| 21               | 6                | 0              | 5.291781                | -4.174794 | -0.189081 |
| 22               | 1                | 0              | 6.004457                | -4.991976 | -0.269690 |
| 23               | 6                | 0              | -1.183819               | 0.798112  | 2.939279  |
| 24               | 1                | 0              | -0.506525               | -0.020426 | 2.735040  |
| 25               | 6                | 0              | -1.677085               | -1.853525 | 0.486175  |
| 26               | 6                | 0              | -1.238607               | -0.521551 | 0.222116  |
| 27               | 6                | 0              | -3.953504               | -1.184780 | 0.075717  |
| 28               | 6                | 0              | -0.066163               | -5.056588 | 1.690603  |
| 29               | 6                | 0              | -5.619775               | -0.116909 | -1.090147 |
| 30               | 6                | 0              | -4.297845               | 1.801425  | -1.865567 |
| 31               | 6                | 0              | 1.246275                | -4.869068 | 1.271241  |

|    |   |   |           |           |           |
|----|---|---|-----------|-----------|-----------|
| 32 | 1 | 0 | 1.966193  | -5.664421 | 1.429156  |
| 33 | 6 | 0 | 5.176142  | -0.466136 | -0.717258 |
| 34 | 6 | 0 | 2.406054  | 2.757895  | -0.177770 |
| 35 | 6 | 0 | -1.045953 | 2.016618  | 2.221999  |
| 36 | 6 | 0 | -5.253545 | -1.335805 | -0.467955 |
| 37 | 6 | 0 | 2.904044  | 0.336469  | -0.171413 |
| 38 | 6 | 0 | 3.997199  | -4.429106 | 0.206961  |
| 39 | 6 | 0 | -1.871819 | 3.110398  | 2.631722  |
| 40 | 6 | 0 | 1.480757  | 3.821573  | 0.042120  |
| 41 | 6 | 0 | 0.269893  | 3.550632  | 0.816379  |
| 42 | 6 | 0 | -0.563668 | 4.620114  | 1.262695  |
| 43 | 1 | 0 | -0.348476 | 5.634511  | 0.949030  |
| 44 | 6 | 0 | -2.137176 | 0.643764  | 3.924785  |
| 45 | 1 | 0 | -2.204656 | -0.299466 | 4.459931  |
| 46 | 6 | 0 | 3.687756  | 3.023687  | -0.748129 |
| 47 | 6 | 0 | -2.931538 | 2.257765  | -1.892416 |
| 48 | 1 | 0 | -2.648231 | 3.062463  | -2.567199 |
| 49 | 6 | 0 | -1.925790 | 1.620221  | -1.176824 |
| 50 | 1 | 0 | -0.909230 | 1.956720  | -1.337954 |
| 51 | 6 | 0 | 7.435830  | -1.299644 | -1.221342 |
| 52 | 1 | 0 | 8.455132  | -1.089732 | -1.536179 |
| 53 | 6 | 0 | -5.783837 | -2.555076 | -0.860427 |
| 54 | 6 | 0 | 4.651614  | 1.936472  | -0.888487 |
| 55 | 6 | 0 | -3.673301 | -3.535956 | -0.015767 |
| 56 | 1 | 0 | -3.075047 | -4.434368 | 0.072118  |
| 57 | 6 | 0 | 5.990222  | 2.155603  | -1.297170 |
| 58 | 6 | 0 | -1.630610 | 4.401284  | 2.085924  |
| 59 | 1 | 0 | -2.267238 | 5.227869  | 2.391847  |
| 60 | 6 | 0 | 6.514278  | -0.211520 | -1.125987 |
| 61 | 6 | 0 | -6.546679 | -0.038068 | -2.116821 |
| 62 | 6 | 0 | -1.023631 | -4.066886 | 1.486610  |
| 63 | 1 | 0 | -2.036180 | -4.227267 | 1.835434  |
| 64 | 6 | 0 | -3.012162 | 1.700762  | 4.252475  |
| 65 | 1 | 0 | -3.771598 | 1.563712  | 5.017319  |
| 66 | 6 | 0 | -2.866931 | 2.916488  | 3.622533  |

|    |   |   |           |           |           |
|----|---|---|-----------|-----------|-----------|
| 67 | 1 | 0 | -3.496901 | 3.759916  | 3.895301  |
| 68 | 6 | 0 | -6.442773 | 1.155782  | -2.927135 |
| 69 | 1 | 0 | -7.170972 | 1.331097  | -3.716066 |
| 70 | 6 | 0 | -5.369949 | 2.028444  | -2.810210 |
| 71 | 1 | 0 | -5.294485 | 2.854886  | -3.513531 |
| 72 | 6 | 0 | -4.955297 | -3.684952 | -0.532287 |
| 73 | 1 | 0 | -5.287463 | -4.687465 | -0.793208 |
| 74 | 6 | 0 | 6.890558  | 1.120097  | -1.412538 |
| 75 | 1 | 0 | 7.913734  | 1.323404  | -1.719119 |
| 76 | 6 | 0 | 1.816347  | 5.106237  | -0.410743 |
| 77 | 1 | 0 | 1.121198  | 5.929253  | -0.294860 |
| 78 | 6 | 0 | -6.905736 | -2.464231 | -1.770245 |
| 79 | 1 | 0 | -7.423544 | -3.372641 | -2.070089 |
| 80 | 6 | 0 | 3.974462  | 4.332429  | -1.169208 |
| 81 | 1 | 0 | 4.922117  | 4.557678  | -1.644587 |
| 82 | 6 | 0 | -7.271396 | -1.265823 | -2.365507 |
| 83 | 1 | 0 | -8.064794 | -1.276524 | -3.109689 |
| 84 | 6 | 0 | 3.042934  | 5.352002  | -1.019374 |
| 85 | 1 | 0 | 3.277701  | 6.352528  | -1.372130 |
| 86 | 1 | 0 | 6.332716  | 3.162683  | -1.506082 |
| 87 | 1 | 0 | -0.348243 | -5.985452 | 2.178725  |
| 88 | 1 | 0 | 3.710382  | -5.453195 | 0.419053  |

-----  
Optimized S0 geometry of *concave-P-2*  
-----

| Center<br>Number | Atomic<br>Number | Atomic<br>Type | Coordinates (Angstroms) |           |           |
|------------------|------------------|----------------|-------------------------|-----------|-----------|
|                  |                  |                | X                       | Y         | Z         |
| 1                | 6                | 0              | 5.077068                | -1.480658 | -0.123768 |
| 2                | 6                | 0              | 1.963170                | 1.428746  | 0.100710  |
| 3                | 6                | 0              | 0.970839                | -2.704796 | 0.026632  |
| 4                | 6                | 0              | 3.715176                | -1.901096 | -0.030135 |
| 5                | 6                | 0              | 0.613301                | 1.012211  | 0.269361  |
| 6                | 6                | 0              | 4.362891                | 0.890202  | -0.196805 |
| 7                | 6                | 0              | 0.275723                | -0.333549 | -0.092826 |
| 8                | 6                | 0              | 2.674131                | -0.910344 | -0.021173 |

|    |   |   |           |           |           |
|----|---|---|-----------|-----------|-----------|
| 9  | 6 | 0 | 2.001276  | -3.689784 | 0.114610  |
| 10 | 6 | 0 | 3.399381  | -3.278277 | 0.040312  |
| 11 | 6 | 0 | 6.121584  | -2.445919 | -0.139771 |
| 12 | 6 | 0 | 1.308025  | -1.310954 | -0.040113 |
| 13 | 6 | 0 | -0.319351 | 1.980868  | 0.851385  |
| 14 | 6 | 0 | -0.405296 | -3.093388 | 0.058202  |
| 15 | 6 | 0 | 7.478148  | -2.010634 | -0.245423 |
| 16 | 1 | 0 | 8.264512  | -2.761424 | -0.254302 |
| 17 | 6 | 0 | 5.778103  | -3.813853 | -0.060998 |
| 18 | 1 | 0 | 6.571028  | -4.557586 | -0.077141 |
| 19 | 6 | 0 | -1.576796 | 0.306449  | 2.273153  |
| 20 | 1 | 0 | -0.795270 | -0.427386 | 2.129999  |
| 21 | 6 | 0 | -1.447510 | -2.105609 | -0.189306 |
| 22 | 6 | 0 | -1.063565 | -0.763043 | -0.503322 |
| 23 | 6 | 0 | 0.297601  | -5.415096 | 0.276947  |
| 24 | 6 | 0 | 1.633414  | -5.036270 | 0.267782  |
| 25 | 1 | 0 | 2.392080  | -5.802807 | 0.371538  |
| 26 | 6 | 0 | 5.398674  | -0.091604 | -0.219839 |
| 27 | 6 | 0 | 2.279268  | 2.830735  | 0.027104  |
| 28 | 6 | 0 | -1.443876 | 1.592227  | 1.684709  |
| 29 | 6 | 0 | 2.995901  | 0.465016  | -0.065159 |
| 30 | 6 | 0 | 4.463870  | -4.213350 | 0.022845  |
| 31 | 6 | 0 | -2.428031 | 2.571435  | 2.030727  |
| 32 | 6 | 0 | 1.233374  | 3.792874  | 0.151059  |
| 33 | 6 | 0 | -0.061046 | 3.354308  | 0.669444  |
| 34 | 6 | 0 | -1.053513 | 4.306636  | 1.050380  |
| 35 | 1 | 0 | -0.879765 | 5.361238  | 0.872565  |
| 36 | 6 | 0 | -2.659336 | -0.017311 | 3.065479  |
| 37 | 1 | 0 | -2.721479 | -1.008130 | 3.506728  |
| 38 | 6 | 0 | 3.610839  | 3.251842  | -0.265188 |
| 39 | 6 | 0 | 7.785181  | -0.683384 | -0.336883 |
| 40 | 1 | 0 | 8.820096  | -0.360167 | -0.418224 |
| 41 | 6 | 0 | 4.683899  | 2.264163  | -0.294756 |
| 42 | 6 | 0 | 6.047514  | 2.631774  | -0.402182 |
| 43 | 6 | 0 | -2.221721 | 3.924709  | 1.645742  |

|    |   |   |           |           |           |
|----|---|---|-----------|-----------|-----------|
| 44 | 1 | 0 | -2.975062 | 4.664940  | 1.904231  |
| 45 | 6 | 0 | 6.759038  | 0.310528  | -0.328976 |
| 46 | 6 | 0 | -0.707515 | -4.463596 | 0.153992  |
| 47 | 1 | 0 | -1.733032 | -4.797248 | 0.079223  |
| 48 | 6 | 0 | -3.676803 | 0.926975  | 3.314996  |
| 49 | 1 | 0 | -4.535317 | 0.656550  | 3.923507  |
| 50 | 6 | 0 | -3.549562 | 2.203793  | 2.815372  |
| 51 | 1 | 0 | -4.295063 | 2.962900  | 3.040443  |
| 52 | 6 | 0 | 7.051298  | 1.689882  | -0.417772 |
| 53 | 1 | 0 | 8.089474  | 2.004317  | -0.491681 |
| 54 | 6 | 0 | 1.518362  | 5.136324  | -0.134269 |
| 55 | 1 | 0 | 0.736754  | 5.885584  | -0.089903 |
| 56 | 6 | 0 | 3.841685  | 4.612120  | -0.528528 |
| 57 | 1 | 0 | 4.833458  | 4.954297  | -0.800688 |
| 58 | 6 | 0 | 2.804618  | 5.535029  | -0.483730 |
| 59 | 1 | 0 | 3.001206  | 6.578608  | -0.713710 |
| 60 | 1 | 0 | 6.321174  | 3.679590  | -0.450381 |
| 61 | 1 | 0 | 0.035294  | -6.466310 | 0.359279  |
| 62 | 1 | 0 | 4.251809  | -5.275367 | 0.061303  |
| 63 | 6 | 0 | -3.209654 | -0.434475 | -1.526360 |
| 64 | 6 | 0 | -3.658465 | -1.662594 | -0.977420 |
| 65 | 6 | 0 | -5.498820 | -0.405761 | -1.489929 |
| 66 | 6 | 0 | -1.985558 | 0.128403  | -1.226721 |
| 67 | 6 | 0 | -2.876072 | -2.478511 | -0.192385 |
| 68 | 6 | 0 | -4.352600 | 0.329627  | -1.868535 |
| 69 | 6 | 0 | -5.068575 | -1.632108 | -0.935085 |
| 70 | 6 | 0 | -3.653072 | -3.369875 | 0.648713  |
| 71 | 1 | 0 | -3.150885 | -4.038101 | 1.340297  |
| 72 | 6 | 0 | -1.900141 | 1.523063  | -1.628755 |
| 73 | 1 | 0 | -0.943736 | 2.028324  | -1.620600 |
| 74 | 6 | 0 | -4.346932 | 1.706947  | -1.987413 |
| 75 | 6 | 0 | -6.715318 | 0.179390  | -1.188180 |
| 76 | 6 | 0 | -5.822725 | -2.369622 | -0.040091 |
| 77 | 6 | 0 | -5.654324 | 2.316531  | -1.878585 |
| 78 | 1 | 0 | -5.756692 | 3.390573  | -2.017507 |

|    |   |   |           |           |           |
|----|---|---|-----------|-----------|-----------|
| 79 | 6 | 0 | -3.015771 | 2.272026  | -1.981899 |
| 80 | 1 | 0 | -2.872885 | 3.328264  | -2.197445 |
| 81 | 6 | 0 | -5.044523 | -3.313792 | 0.723246  |
| 82 | 1 | 0 | -5.538769 | -3.953095 | 1.451592  |
| 83 | 6 | 0 | -6.779307 | 1.592413  | -1.495853 |
| 84 | 1 | 0 | -7.713195 | 2.130817  | -1.349695 |
| 85 | 6 | 0 | -7.596692 | -0.668774 | -0.408556 |
| 86 | 1 | 0 | -8.599330 | -0.320104 | -0.170551 |
| 87 | 6 | 0 | -7.174659 | -1.875591 | 0.135994  |
| 88 | 1 | 0 | -7.863745 | -2.420060 | 0.777882  |

-----

Optimized S0 geometry of 'TS<sub>1</sub>'

-----

| Center<br>Number | Atomic<br>Number | Atomic<br>Type | Coordinates (Angstroms) |           |           |
|------------------|------------------|----------------|-------------------------|-----------|-----------|
|                  |                  |                | X                       | Y         | Z         |
| 1                | 6                | 0              | 4.895360                | -1.721915 | -0.398209 |
| 2                | 6                | 0              | 2.036466                | 1.405931  | 0.119020  |
| 3                | 6                | 0              | 0.797009                | -2.632230 | 0.423719  |
| 4                | 6                | 0              | 3.544626                | -2.034549 | -0.064290 |
| 5                | 6                | 0              | 0.696908                | 1.085718  | 0.482566  |
| 6                | 6                | 0              | 4.331130                | 0.690427  | -0.497050 |
| 7                | 6                | 0              | 0.233346                | -0.244613 | 0.218423  |
| 8                | 6                | 0              | 2.579227                | -0.974939 | 0.006852  |
| 9                | 6                | 0              | 1.781051                | -3.655464 | 0.568605  |
| 10               | 6                | 0              | 3.164086                | -3.370199 | 0.200941  |
| 11               | 6                | 0              | 5.859874                | -2.761901 | -0.502354 |
| 12               | 6                | 0              | 1.203118                | -1.280993 | 0.174972  |
| 13               | 6                | 0              | -0.093444               | 2.127814  | 1.138084  |
| 14               | 6                | 0              | -0.583466               | -2.909775 | 0.664729  |
| 15               | 6                | 0              | 7.203798                | -2.432878 | -0.859994 |
| 16               | 1                | 0              | 7.930757                | -3.237120 | -0.942998 |
| 17               | 6                | 0              | 5.449102                | -4.091382 | -0.252832 |
| 18               | 1                | 0              | 6.178681                | -4.892577 | -0.342240 |
| 19               | 6                | 0              | -1.319906               | 0.565787  | 2.710848  |
| 20               | 1                | 0              | -0.617846               | -0.229394 | 2.499684  |

|    |   |   |           |           |           |
|----|---|---|-----------|-----------|-----------|
| 21 | 6 | 0 | -1.591482 | -1.953053 | 0.205451  |
| 22 | 6 | 0 | -1.155138 | -0.601747 | -0.080201 |
| 23 | 6 | 0 | 0.070361  | -5.106346 | 1.492432  |
| 24 | 6 | 0 | 1.386908  | -4.892509 | 1.102118  |
| 25 | 1 | 0 | 2.121220  | -5.671869 | 1.273005  |
| 26 | 6 | 0 | 5.282474  | -0.366180 | -0.633641 |
| 27 | 6 | 0 | 2.433476  | 2.778746  | -0.040945 |
| 28 | 6 | 0 | -1.150406 | 1.832746  | 2.090918  |
| 29 | 6 | 0 | 2.974661  | 0.370769  | -0.149054 |
| 30 | 6 | 0 | 4.147748  | -4.383093 | 0.093255  |
| 31 | 6 | 0 | -2.016211 | 2.887581  | 2.521529  |
| 32 | 6 | 0 | 1.484715  | 3.814778  | 0.207661  |
| 33 | 6 | 0 | 0.238915  | 3.476870  | 0.894633  |
| 34 | 6 | 0 | -0.633419 | 4.504031  | 1.364719  |
| 35 | 1 | 0 | -0.407607 | 5.540748  | 1.145916  |
| 36 | 6 | 0 | -2.334310 | 0.333907  | 3.617234  |
| 37 | 1 | 0 | -2.423237 | -0.645067 | 4.080090  |
| 38 | 6 | 0 | 3.736854  | 3.097342  | -0.531349 |
| 39 | 6 | 0 | 7.573121  | -1.138506 | -1.092248 |
| 40 | 1 | 0 | 8.598680  | -0.897737 | -1.361465 |
| 41 | 6 | 0 | 4.722282  | 2.033788  | -0.701928 |
| 42 | 6 | 0 | 6.070415  | 2.293543  | -1.051820 |
| 43 | 6 | 0 | -1.752202 | 4.217295  | 2.092993  |
| 44 | 1 | 0 | -2.416343 | 5.014847  | 2.417061  |
| 45 | 6 | 0 | 6.629461  | -0.070911 | -0.980355 |
| 46 | 6 | 0 | -0.903054 | -4.136891 | 1.268709  |
| 47 | 1 | 0 | -1.910474 | -4.323841 | 1.608468  |
| 48 | 6 | 0 | -3.244605 | 1.356416  | 3.956853  |
| 49 | 1 | 0 | -4.051828 | 1.158815  | 4.656763  |
| 50 | 6 | 0 | -3.073706 | 2.614956  | 3.425174  |
| 51 | 1 | 0 | -3.731343 | 3.431642  | 3.713603  |
| 52 | 6 | 0 | 6.991577  | 1.279093  | -1.188750 |
| 53 | 1 | 0 | 8.020705  | 1.513625  | -1.449698 |
| 54 | 6 | 0 | 1.823851  | 5.132013  | -0.136565 |
| 55 | 1 | 0 | 1.113038  | 5.937765  | 0.002667  |

|    |   |   |           |           |           |
|----|---|---|-----------|-----------|-----------|
| 56 | 6 | 0 | 4.024581  | 4.435647  | -0.844660 |
| 57 | 1 | 0 | 4.990680  | 4.704707  | -1.255649 |
| 58 | 6 | 0 | 3.074094  | 5.432938  | -0.666493 |
| 59 | 1 | 0 | 3.312134  | 6.458471  | -0.935191 |
| 60 | 1 | 0 | 6.403209  | 3.314642  | -1.198963 |
| 61 | 1 | 0 | -0.205177 | -6.041780 | 1.971625  |
| 62 | 1 | 0 | 3.872477  | -5.419205 | 0.257526  |
| 63 | 6 | 0 | -3.270010 | -0.140239 | -1.025401 |
| 64 | 6 | 0 | -3.720761 | -1.423653 | -0.681406 |
| 65 | 6 | 0 | -5.471011 | -0.267700 | -1.545741 |
| 66 | 6 | 0 | -2.036516 | 0.378495  | -0.757853 |
| 67 | 6 | 0 | -2.988874 | -2.395389 | -0.056250 |
| 68 | 6 | 0 | -4.350182 | 0.565195  | -1.572799 |
| 69 | 6 | 0 | -5.081786 | -1.498297 | -1.009015 |
| 70 | 6 | 0 | -3.827318 | -3.581262 | 0.163408  |
| 71 | 1 | 0 | -3.405870 | -4.493683 | 0.562641  |
| 72 | 6 | 0 | -1.945653 | 1.755967  | -1.246112 |
| 73 | 1 | 0 | -1.002413 | 2.283046  | -1.209338 |
| 74 | 6 | 0 | -4.357395 | 1.889449  | -1.921785 |
| 75 | 6 | 0 | -6.756240 | 0.109104  | -1.837421 |
| 76 | 6 | 0 | -5.928309 | -2.536653 | -0.724932 |
| 77 | 6 | 0 | -5.692021 | 2.337465  | -2.298937 |
| 78 | 1 | 0 | -5.845927 | 3.367614  | -2.612220 |
| 79 | 6 | 0 | -3.030916 | 2.467140  | -1.772224 |
| 80 | 1 | 0 | -2.845534 | 3.494724  | -2.076054 |
| 81 | 6 | 0 | -5.197302 | -3.639769 | -0.127998 |
| 82 | 1 | 0 | -5.709606 | -4.569550 | 0.109080  |
| 83 | 6 | 0 | -6.818233 | 1.504333  | -2.255528 |
| 84 | 1 | 0 | -7.773831 | 1.941937  | -2.535513 |
| 85 | 6 | 0 | -7.698558 | -0.974820 | -1.582918 |
| 86 | 1 | 0 | -8.757337 | -0.827605 | -1.783979 |
| 87 | 6 | 0 | -7.309367 | -2.216942 | -1.065809 |
| 88 | 1 | 0 | -8.089964 | -2.956064 | -0.900673 |

---

Optimized S0 geometry of **M-1** (at the B3LYP/6-31G(d)/PCM level)

---



| Center<br>Number | Atomic<br>Number | Atomic<br>Type | Coordinates (Angstroms) |           |           |
|------------------|------------------|----------------|-------------------------|-----------|-----------|
|                  |                  |                | X                       | Y         | Z         |
| 1                | 6                | 0              | -1.573832               | 1.499239  | 0.274452  |
| 2                | 6                | 0              | 0.815734                | 1.117117  | -0.123065 |
| 3                | 6                | 0              | 3.434932                | 2.119159  | -0.542140 |
| 4                | 6                | 0              | 1.709676                | -1.149585 | 0.155160  |
| 5                | 6                | 0              | 1.001478                | 2.539507  | -0.292411 |
| 6                | 6                | 0              | 3.266373                | 0.726985  | -0.314158 |
| 7                | 6                | 0              | -1.342279               | 2.904321  | 0.312043  |
| 8                | 6                | 0              | -0.103716               | 3.440525  | -0.264522 |
| 9                | 6                | 0              | -2.083835               | -1.319830 | 0.096163  |
| 10               | 6                | 0              | 2.868934                | -1.974313 | 0.489250  |
| 11               | 6                | 0              | -4.693557               | -2.267198 | 0.418403  |
| 12               | 6                | 0              | -3.634174               | -3.157676 | 0.081313  |
| 13               | 6                | 0              | 1.928959                | 0.234342  | -0.089394 |
| 14               | 6                | 0              | 2.728895                | -3.219674 | 1.131163  |
| 15               | 1                | 0              | 1.740724                | -3.640261 | 1.282694  |
| 16               | 6                | 0              | 0.093180                | 4.793546  | -0.725101 |
| 17               | 6                | 0              | -0.719027               | -0.804618 | 0.069735  |
| 18               | 6                | 0              | -3.143948               | -0.426127 | 0.434411  |
| 19               | 6                | 0              | 0.400987                | -1.638908 | 0.187619  |
| 20               | 1                | 0              | 0.238899                | -2.692033 | 0.369389  |
| 21               | 6                | 0              | 3.870692                | 4.894722  | -0.858773 |
| 22               | 1                | 0              | 4.019875                | 5.964909  | -0.979457 |
| 23               | 6                | 0              | -0.498366               | 0.598955  | 0.007694  |
| 24               | 6                | 0              | 4.931479                | 4.036579  | -0.908482 |
| 25               | 1                | 0              | 5.938799                | 4.412070  | -1.071165 |
| 26               | 6                | 0              | 1.409086                | 5.236617  | -0.821288 |
| 27               | 1                | 0              | 1.602907                | 6.271066  | -1.083601 |
| 28               | 6                | 0              | 2.323281                | 3.014015  | -0.510644 |
| 29               | 6                | 0              | -2.825501               | 0.974689  | 0.701977  |
| 30               | 6                | 0              | 4.380594                | -0.160562 | -0.352726 |
| 31               | 6                | 0              | 4.182550                | -1.460777 | 0.302542  |
| 32               | 6                | 0              | 2.535308                | 4.403144  | -0.692237 |
| 33               | 6                | 0              | 4.737709                | 2.623076  | -0.782867 |

|    |   |   |           |           |           |
|----|---|---|-----------|-----------|-----------|
| 34 | 6 | 0 | -5.620426 | -4.196487 | -0.413265 |
| 35 | 6 | 0 | -4.541363 | -0.892749 | 0.447010  |
| 36 | 6 | 0 | -2.363234 | -2.723782 | -0.247069 |
| 37 | 6 | 0 | -2.242518 | 3.692448  | 1.040992  |
| 38 | 1 | 0 | -1.997377 | 4.735626  | 1.189081  |
| 39 | 6 | 0 | 5.772494  | 1.696739  | -1.010743 |
| 40 | 1 | 0 | 6.723418  | 2.103310  | -1.339541 |
| 41 | 6 | 0 | -5.915267 | -2.910359 | 0.101015  |
| 42 | 6 | 0 | -3.690220 | 1.821093  | 1.418653  |
| 43 | 1 | 0 | -4.573030 | 1.388630  | 1.866582  |
| 44 | 6 | 0 | 5.613978  | 0.316076  | -0.928770 |
| 45 | 6 | 0 | -4.212099 | -4.340913 | -0.440052 |
| 46 | 6 | 0 | 5.253907  | -2.146694 | 0.912963  |
| 47 | 1 | 0 | 6.228059  | -1.677839 | 0.879523  |
| 48 | 6 | 0 | -1.625887 | -3.659876 | -1.074221 |
| 49 | 1 | 0 | -0.624801 | -3.412454 | -1.407933 |
| 50 | 6 | 0 | -5.782890 | -0.169410 | 0.244915  |
| 51 | 1 | 0 | -5.778763 | 0.913893  | 0.225430  |
| 52 | 6 | 0 | -2.310794 | 5.083665  | -1.720652 |
| 53 | 1 | 0 | -2.114385 | 4.207346  | -2.348840 |
| 54 | 1 | 0 | -2.900817 | 5.791700  | -2.313352 |
| 55 | 1 | 0 | -2.933023 | 4.762960  | -0.887674 |
| 56 | 6 | 0 | 5.110612  | -3.355077 | 1.595273  |
| 57 | 6 | 0 | -7.078349 | -2.229002 | -0.223426 |
| 58 | 6 | 0 | -6.469500 | -4.886749 | -1.263000 |
| 59 | 6 | 0 | -3.566942 | -5.177268 | -1.338058 |
| 60 | 6 | 0 | -0.991211 | 5.769695  | -1.296190 |
| 61 | 6 | 0 | 3.815372  | -3.902637 | 1.653224  |
| 62 | 1 | 0 | 3.637415  | -4.845385 | 2.157395  |
| 63 | 6 | 0 | -8.065818 | -3.020015 | -0.927439 |
| 64 | 1 | 0 | -9.033407 | -2.581243 | -1.159627 |
| 65 | 6 | 0 | -6.984604 | -0.801106 | -0.058372 |
| 66 | 1 | 0 | -7.848778 | -0.177966 | -0.276847 |
| 67 | 6 | 0 | -3.393665 | 3.167361  | 1.647116  |
| 68 | 6 | 0 | -2.190630 | -4.826748 | -1.579355 |

|     |   |   |           |           |           |
|-----|---|---|-----------|-----------|-----------|
| 69  | 1 | 0 | -1.594848 | -5.430285 | -2.260194 |
| 70  | 6 | 0 | 6.718024  | -0.536052 | -1.640996 |
| 71  | 6 | 0 | -0.443770 | 6.392945  | -2.615671 |
| 72  | 1 | 0 | 0.423556  | 7.039977  | -2.463376 |
| 73  | 1 | 0 | -1.225206 | 7.010027  | -3.072957 |
| 74  | 1 | 0 | -0.163931 | 5.613439  | -3.332815 |
| 75  | 6 | 0 | -1.276714 | 6.937893  | -0.323523 |
| 76  | 1 | 0 | -1.723480 | 6.604852  | 0.618093  |
| 77  | 1 | 0 | -1.971127 | 7.650996  | -0.784570 |
| 78  | 1 | 0 | -0.355710 | 7.478256  | -0.077468 |
| 79  | 6 | 0 | -7.777509 | -4.285961 | -1.419442 |
| 80  | 1 | 0 | -8.530579 | -4.793809 | -2.017554 |
| 81  | 6 | 0 | -5.825119 | -5.925313 | -2.039290 |
| 82  | 1 | 0 | -6.426856 | -6.560404 | -2.685348 |
| 83  | 6 | 0 | 6.284095  | -1.976055 | -1.999414 |
| 84  | 1 | 0 | 6.206095  | -2.643562 | -1.143741 |
| 85  | 1 | 0 | 7.024812  | -2.406919 | -2.682622 |
| 86  | 1 | 0 | 5.316650  | -1.977469 | -2.514291 |
| 87  | 6 | 0 | -4.277478 | 4.069801  | 2.530451  |
| 88  | 6 | 0 | -4.443826 | -6.061181 | -2.077313 |
| 89  | 1 | 0 | -4.012910 | -6.796099 | -2.753234 |
| 90  | 6 | 0 | 6.325428  | -4.021904 | 2.270404  |
| 91  | 6 | 0 | 8.041429  | -0.551113 | -0.841094 |
| 92  | 1 | 0 | 8.402850  | 0.466819  | -0.656984 |
| 93  | 1 | 0 | 8.816136  | -1.083803 | -1.405850 |
| 94  | 1 | 0 | 7.943373  | -1.044617 | 0.130571  |
| 95  | 6 | 0 | 7.017963  | 0.127397  | -3.019089 |
| 96  | 1 | 0 | 6.107268  | 0.206232  | -3.623010 |
| 97  | 1 | 0 | 7.737125  | -0.490778 | -3.568423 |
| 98  | 1 | 0 | 7.452924  | 1.126066  | -2.932341 |
| 99  | 6 | 0 | 5.935497  | -5.301403 | 3.036134  |
| 100 | 1 | 0 | 5.207138  | -5.096376 | 3.828893  |
| 101 | 1 | 0 | 6.826399  | -5.730956 | 3.507547  |
| 102 | 1 | 0 | 5.514219  | -6.064624 | 2.372029  |
| 103 | 6 | 0 | 7.372737  | -4.407294 | 1.199009  |

|     |   |   |           |           |          |
|-----|---|---|-----------|-----------|----------|
| 104 | 1 | 0 | 6.949152  | -5.107911 | 0.469953 |
| 105 | 1 | 0 | 8.238415  | -4.890034 | 1.668962 |
| 106 | 1 | 0 | 7.738055  | -3.532875 | 0.650720 |
| 107 | 6 | 0 | 6.962855  | -3.038023 | 3.280033 |
| 108 | 1 | 0 | 7.309348  | -2.118816 | 2.796411 |
| 109 | 1 | 0 | 7.828361  | -3.503579 | 3.766963 |
| 110 | 1 | 0 | 6.244957  | -2.757091 | 4.058996 |
| 111 | 6 | 0 | -5.438464 | 3.295084  | 3.183929 |
| 112 | 1 | 0 | -6.121061 | 2.870465  | 2.439170 |
| 113 | 1 | 0 | -6.022599 | 3.975729  | 3.813164 |
| 114 | 1 | 0 | -5.077090 | 2.480804  | 3.822158 |
| 115 | 6 | 0 | -3.420667 | 4.685547  | 3.662629 |
| 116 | 1 | 0 | -2.980310 | 3.902990  | 4.290894 |
| 117 | 1 | 0 | -4.042629 | 5.324600  | 4.301067 |
| 118 | 1 | 0 | -2.603844 | 5.301725  | 3.272959 |
| 119 | 6 | 0 | -4.882757 | 5.205076  | 1.671011 |
| 120 | 1 | 0 | -4.108701 | 5.826027  | 1.208100 |
| 121 | 1 | 0 | -5.506948 | 5.859574  | 2.291586 |
| 122 | 1 | 0 | -5.510431 | 4.797594  | 0.869883 |

-----  
Optimized S0 geometry of **P-2** (at the B3LYP/6-31G(d)/PCM level)  
-----

| Center<br>Number | Atomic<br>Number | Atomic<br>Type | Coordinates (Angstroms) |           |           |
|------------------|------------------|----------------|-------------------------|-----------|-----------|
|                  |                  |                | X                       | Y         | Z         |
| 1                | 6                | 0              | -2.323284               | 3.578516  | -0.556256 |
| 2                | 6                | 0              | -1.846927               | -0.540147 | 0.398853  |
| 3                | 6                | 0              | 1.539778                | 1.958885  | 0.169008  |
| 4                | 6                | 0              | -1.013095               | 3.064357  | -0.362427 |
| 5                | 6                | 0              | -0.561381               | -1.077658 | 0.681114  |
| 6                | 6                | 0              | -3.349043               | 1.362241  | -0.114235 |
| 7                | 6                | 0              | 0.583345                | -0.306627 | 0.314727  |
| 8                | 6                | 0              | -0.881502               | 1.660790  | -0.053971 |
| 9                | 6                | 0              | 1.371414                | 3.369349  | 0.079357  |
| 10               | 6                | 0              | 0.129595                | 3.907639  | -0.488565 |
| 11               | 6                | 0              | -2.483251               | 4.944017  | -0.899487 |

|    |   |   |           |           |           |
|----|---|---|-----------|-----------|-----------|
| 12 | 6 | 0 | 4.422790  | -0.486794 | 0.100654  |
| 13 | 6 | 0 | 0.409357  | 1.084504  | 0.077087  |
| 14 | 6 | 0 | -0.527741 | -2.395993 | 1.327294  |
| 15 | 6 | 0 | 2.118268  | -2.233269 | -0.342529 |
| 16 | 6 | 0 | 2.801237  | 1.425474  | 0.550046  |
| 17 | 6 | 0 | -3.802504 | 5.484911  | -1.035486 |
| 18 | 1 | 0 | -3.910231 | 6.533805  | -1.300570 |
| 19 | 6 | 0 | 3.867879  | -3.860660 | -0.931038 |
| 20 | 6 | 0 | 3.411181  | -2.707995 | -0.246792 |
| 21 | 6 | 0 | -1.330880 | 5.695115  | -1.193195 |
| 22 | 1 | 0 | -1.494005 | 6.696874  | -1.574647 |
| 23 | 6 | 0 | 1.352170  | -1.852136 | 2.925330  |
| 24 | 1 | 0 | 1.259247  | -0.797470 | 2.700383  |
| 25 | 6 | 0 | 3.050952  | 0.008436  | 0.301169  |
| 26 | 6 | 0 | 1.928021  | -0.854368 | 0.127362  |
| 27 | 6 | 0 | 4.533632  | -1.861747 | -0.018585 |
| 28 | 6 | 0 | 3.511265  | 3.659033  | 1.265144  |
| 29 | 6 | 0 | 5.268131  | -3.747138 | -1.106586 |
| 30 | 6 | 0 | 3.068990  | -4.612918 | -1.778560 |
| 31 | 6 | 0 | 2.346726  | 4.177917  | 0.679637  |
| 32 | 1 | 0 | 2.154982  | 5.240868  | 0.738463  |
| 33 | 6 | 0 | 1.068909  | 6.062542  | -1.811416 |
| 34 | 6 | 0 | -3.474030 | 2.751171  | -0.387231 |
| 35 | 6 | 0 | -2.980932 | -1.414953 | 0.295458  |
| 36 | 6 | 0 | 0.480465  | -2.780388 | 2.294080  |
| 37 | 6 | 0 | 5.675969  | -2.506338 | -0.556960 |
| 38 | 6 | 0 | -2.019388 | 0.825567  | 0.045806  |
| 39 | 6 | 0 | -0.030845 | 5.206036  | -1.095844 |
| 40 | 6 | 0 | 0.554599  | -4.144959 | 2.720715  |
| 41 | 6 | 0 | -2.780734 | -2.821912 | 0.369890  |
| 42 | 6 | 0 | -1.572285 | -3.297704 | 1.044208  |
| 43 | 6 | 0 | -1.475265 | -4.647307 | 1.496177  |
| 44 | 1 | 0 | -2.263362 | -5.350165 | 1.250235  |
| 45 | 6 | 0 | 2.292050  | -2.259796 | 3.849727  |
| 46 | 1 | 0 | 2.934685  | -1.521530 | 4.321586  |

|    |   |   |           |           |           |
|----|---|---|-----------|-----------|-----------|
| 47 | 6 | 0 | -4.259669 | -0.905534 | -0.053828 |
| 48 | 6 | 0 | 1.682249  | -4.217282 | -1.783267 |
| 49 | 1 | 0 | 0.973275  | -4.757053 | -2.406821 |
| 50 | 6 | 0 | 1.235464  | -3.085009 | -1.112126 |
| 51 | 1 | 0 | 0.200754  | -2.795301 | -1.251082 |
| 52 | 6 | 0 | -4.903384 | 4.701500  | -0.841166 |
| 53 | 1 | 0 | -5.902678 | 5.120381  | -0.930911 |
| 54 | 6 | 0 | 6.796446  | -1.827872 | -1.011551 |
| 55 | 6 | 0 | -4.504043 | 0.538156  | 0.028413  |
| 56 | 6 | 0 | 5.641798  | 0.222986  | -0.240057 |
| 57 | 1 | 0 | 5.666245  | 1.304954  | -0.197342 |
| 58 | 6 | 0 | -5.790259 | 1.171358  | 0.185508  |
| 59 | 6 | 0 | -0.421606 | -5.070635 | 2.257239  |
| 60 | 1 | 0 | -0.356886 | -6.107188 | 2.578604  |
| 61 | 6 | 0 | -4.768444 | 3.315578  | -0.505691 |
| 62 | 6 | 0 | 5.958856  | -4.392026 | -2.120181 |
| 63 | 6 | 0 | 3.744742  | 2.286559  | 1.134617  |
| 64 | 1 | 0 | 4.645927  | 1.854723  | 1.546951  |
| 65 | 6 | 0 | 2.417088  | -3.622911 | 4.197071  |
| 66 | 1 | 0 | 3.171572  | -3.935688 | 4.913529  |
| 67 | 6 | 0 | 0.490612  | 6.585317  | -3.160756 |
| 68 | 1 | 0 | 0.132335  | 5.758181  | -3.783416 |
| 69 | 1 | 0 | 1.281107  | 7.106750  | -3.711594 |
| 70 | 1 | 0 | -0.330253 | 7.295821  | -3.035644 |
| 71 | 6 | 0 | 1.551502  | -4.543199 | 3.648263  |
| 72 | 1 | 0 | 1.600825  | -5.590247 | 3.937574  |
| 73 | 6 | 0 | 5.173125  | -5.355206 | -2.861503 |
| 74 | 1 | 0 | 5.651172  | -5.953480 | -3.633814 |
| 75 | 6 | 0 | 2.330310  | 5.266931  | -2.221815 |
| 76 | 1 | 0 | 2.974176  | 4.993694  | -1.388233 |
| 77 | 1 | 0 | 2.927288  | 5.880838  | -2.905745 |
| 78 | 1 | 0 | 2.058996  | 4.346786  | -2.751707 |
| 79 | 6 | 0 | 3.797323  | -5.456949 | -2.701550 |
| 80 | 1 | 0 | 3.247866  | -6.129581 | -3.356246 |
| 81 | 6 | 0 | 6.769491  | -0.411925 | -0.749088 |

|     |   |   |           |           |           |
|-----|---|---|-----------|-----------|-----------|
| 82  | 1 | 0 | 7.610874  | 0.206356  | -1.053613 |
| 83  | 6 | 0 | -5.875968 | 2.512408  | -0.179096 |
| 84  | 1 | 0 | -6.839806 | 3.009076  | -0.152773 |
| 85  | 6 | 0 | 1.458752  | 7.302827  | -0.973131 |
| 86  | 1 | 0 | 0.579844  | 7.918477  | -0.751016 |
| 87  | 1 | 0 | 2.171480  | 7.923935  | -1.529389 |
| 88  | 1 | 0 | 1.924753  | 7.040294  | -0.018688 |
| 89  | 6 | 0 | -3.772061 | -3.670942 | -0.130689 |
| 90  | 1 | 0 | -3.597487 | -4.740558 | -0.132567 |
| 91  | 6 | 0 | 7.644339  | -2.587901 | -1.906103 |
| 92  | 1 | 0 | 8.579431  | -2.153103 | -2.251641 |
| 93  | 6 | 0 | -5.195598 | -1.802298 | -0.601305 |
| 94  | 1 | 0 | -6.109270 | -1.390019 | -1.004170 |
| 95  | 6 | 0 | 7.247382  | -3.809893 | -2.431499 |
| 96  | 1 | 0 | 7.886744  | -4.290235 | -3.168655 |
| 97  | 6 | 0 | 4.482378  | 4.598056  | 2.007473  |
| 98  | 6 | 0 | -4.963033 | -3.178143 | -0.684540 |
| 99  | 6 | 0 | -7.064410 | 0.581389  | 0.880935  |
| 100 | 6 | 0 | -8.181688 | 0.284836  | -0.146609 |
| 101 | 1 | 0 | -8.439125 | 1.183114  | -0.719215 |
| 102 | 1 | 0 | -9.088333 | -0.054761 | 0.369242  |
| 103 | 1 | 0 | -7.898112 | -0.491699 | -0.862959 |
| 104 | 6 | 0 | -6.802030 | -0.661079 | 1.763834  |
| 105 | 1 | 0 | -6.614716 | -1.573260 | 1.200784  |
| 106 | 1 | 0 | -7.684399 | -0.840298 | 2.388420  |
| 107 | 1 | 0 | -5.949137 | -0.497929 | 2.432174  |
| 108 | 6 | 0 | -7.617451 | 1.646953  | 1.874676  |
| 109 | 1 | 0 | -6.852018 | 1.941854  | 2.600775  |
| 110 | 1 | 0 | -8.461885 | 1.219457  | 2.426548  |
| 111 | 1 | 0 | -7.983819 | 2.550953  | 1.382242  |
| 112 | 6 | 0 | -5.955614 | -4.157986 | -1.339500 |
| 113 | 6 | 0 | 5.657829  | 3.836360  | 2.649758  |
| 114 | 1 | 0 | 5.312919  | 3.089989  | 3.374322  |
| 115 | 1 | 0 | 6.303156  | 4.542855  | 3.183529  |
| 116 | 1 | 0 | 6.277007  | 3.327844  | 1.902094  |

|     |   |   |           |           |           |
|-----|---|---|-----------|-----------|-----------|
| 117 | 6 | 0 | 3.723007  | 5.340213  | 3.133390  |
| 118 | 1 | 0 | 2.896151  | 5.942934  | 2.743729  |
| 119 | 1 | 0 | 4.403781  | 6.014862  | 3.666257  |
| 120 | 1 | 0 | 3.308313  | 4.632176  | 3.859960  |
| 121 | 6 | 0 | 5.064348  | 5.632589  | 1.015213  |
| 122 | 1 | 0 | 5.617946  | 5.135895  | 0.209879  |
| 123 | 1 | 0 | 5.754350  | 6.309384  | 1.533597  |
| 124 | 1 | 0 | 4.281042  | 6.244715  | 0.556299  |
| 125 | 6 | 0 | -7.177972 | -3.443634 | -1.946523 |
| 126 | 1 | 0 | -6.886437 | -2.714969 | -2.711631 |
| 127 | 1 | 0 | -7.770600 | -2.925167 | -1.184777 |
| 128 | 1 | 0 | -7.832627 | -4.180542 | -2.424944 |
| 129 | 6 | 0 | -6.462330 | -5.165461 | -0.279370 |
| 130 | 1 | 0 | -5.641842 | -5.738243 | 0.165444  |
| 131 | 1 | 0 | -7.157361 | -5.879716 | -0.737330 |
| 132 | 1 | 0 | -6.990311 | -4.650127 | 0.531365  |
| 133 | 6 | 0 | -5.241223 | -4.929030 | -2.475809 |
| 134 | 1 | 0 | -4.874464 | -4.241238 | -3.246368 |
| 135 | 1 | 0 | -5.936110 | -5.632411 | -2.950228 |
| 136 | 1 | 0 | -4.386326 | -5.504642 | -2.106127 |

-----  
Optimized S0 geometry of **M-2** (at the B3LYP/6-31G(d)/PCM level)  
-----

| Center<br>Number | Atomic<br>Number | Atomic<br>Type | Coordinates (Angstroms) |           |           |
|------------------|------------------|----------------|-------------------------|-----------|-----------|
|                  |                  |                | X                       | Y         | Z         |
| 1                | 6                | 0              | 2.334129                | 3.562129  | -0.554942 |
| 2                | 6                | 0              | 1.839802                | -0.555063 | 0.400063  |
| 3                | 6                | 0              | -1.535893               | 1.959274  | 0.169821  |
| 4                | 6                | 0              | 1.022003                | 3.053279  | -0.361345 |
| 5                | 6                | 0              | 0.551604                | -1.086778 | 0.681078  |
| 6                | 6                | 0              | 3.351867                | 1.341992  | -0.110229 |
| 7                | 6                | 0              | -0.589907               | -0.309928 | 0.314871  |
| 8                | 6                | 0              | 0.884897                | 1.650276  | -0.052166 |
| 9                | 6                | 0              | -1.361318               | 3.368831  | 0.080262  |
| 10               | 6                | 0              | -0.117153               | 3.901189  | -0.488342 |



|    |   |   |           |           |           |
|----|---|---|-----------|-----------|-----------|
| 11 | 6 | 0 | 2.499410  | 4.926864  | -0.899040 |
| 12 | 6 | 0 | -4.430057 | -0.473246 | 0.101265  |
| 13 | 6 | 0 | -0.409216 | 1.079870  | 0.078368  |
| 14 | 6 | 0 | 0.510991  | -2.405144 | 1.324427  |
| 15 | 6 | 0 | -2.133139 | -2.229235 | -0.344805 |
| 16 | 6 | 0 | -2.799730 | 1.431562  | 0.550677  |
| 17 | 6 | 0 | 3.820705  | 5.463216  | -1.033733 |
| 18 | 1 | 0 | 3.932364  | 6.511484  | -1.299653 |
| 19 | 6 | 0 | -3.890084 | -3.848536 | -0.933582 |
| 20 | 6 | 0 | -3.428012 | -2.698362 | -0.248805 |
| 21 | 6 | 0 | 1.350328  | 5.682150  | -1.194139 |
| 22 | 1 | 0 | 1.517522  | 6.683063  | -1.576063 |
| 23 | 6 | 0 | -1.367747 | -1.856946 | 2.922306  |
| 24 | 1 | 0 | -1.269019 | -0.802019 | 2.700945  |
| 25 | 6 | 0 | -3.055929 | 0.015964  | 0.301209  |
| 26 | 6 | 0 | -1.936713 | -0.851594 | 0.126405  |
| 27 | 6 | 0 | -4.546741 | -1.847597 | -0.019025 |
| 28 | 6 | 0 | -3.499504 | 3.668168  | 1.266430  |
| 29 | 6 | 0 | -5.289971 | -3.729047 | -1.107885 |
| 30 | 6 | 0 | -3.095003 | -4.603692 | -1.782072 |
| 31 | 6 | 0 | -2.332605 | 4.181856  | 0.680672  |
| 32 | 1 | 0 | -2.136173 | 5.243969  | 0.739190  |
| 33 | 6 | 0 | -1.048059 | 6.058571  | -1.812778 |
| 34 | 6 | 0 | 3.481575  | 2.730553  | -0.383739 |
| 35 | 6 | 0 | 2.969979  | -1.435006 | 0.299599  |
| 36 | 6 | 0 | -0.500468 | -2.787652 | 2.288781  |
| 37 | 6 | 0 | -5.692184 | -2.487001 | -0.556956 |
| 38 | 6 | 0 | 2.018984  | 0.810335  | 0.048050  |
| 39 | 6 | 0 | 0.048329  | 5.198199  | -1.096730 |
| 40 | 6 | 0 | -0.582040 | -4.153077 | 2.710764  |
| 41 | 6 | 0 | 2.763970  | -2.838540 | 0.371613  |
| 42 | 6 | 0 | 1.552356  | -3.310918 | 1.040138  |
| 43 | 6 | 0 | 1.446955  | -4.662066 | 1.487033  |
| 44 | 1 | 0 | 2.231607  | -5.368353 | 1.240130  |
| 45 | 6 | 0 | -2.310733 | -2.262752 | 3.844460  |

|    |   |   |           |           |           |
|----|---|---|-----------|-----------|-----------|
| 46 | 1 | 0 | -2.949938 | -1.522693 | 4.318165  |
| 47 | 6 | 0 | 4.254620  | -0.929530 | -0.045212 |
| 48 | 6 | 0 | -1.706560 | -4.214026 | -1.787304 |
| 49 | 1 | 0 | -1.000259 | -4.756487 | -2.411552 |
| 50 | 6 | 0 | -1.254482 | -3.084193 | -1.115577 |
| 51 | 1 | 0 | -0.218523 | -2.799006 | -1.254670 |
| 52 | 6 | 0 | 4.918341  | 4.676302  | -0.836532 |
| 53 | 1 | 0 | 5.919325  | 5.091447  | -0.924681 |
| 54 | 6 | 0 | -6.810269 | -1.803555 | -1.009959 |
| 55 | 6 | 0 | 4.504146  | 0.514861  | 0.036600  |
| 56 | 6 | 0 | -5.646411 | 0.241856  | -0.237797 |
| 57 | 1 | 0 | -5.666397 | 1.323876  | -0.194115 |
| 58 | 6 | 0 | 5.792136  | 1.144739  | 0.195116  |
| 59 | 6 | 0 | 0.390073  | -5.082263 | 2.245048  |
| 60 | 1 | 0 | 0.319460  | -6.119569 | 2.562748  |
| 61 | 6 | 0 | 4.777827  | 3.291116  | -0.499883 |
| 62 | 6 | 0 | -5.984267 | -4.370404 | -2.121276 |
| 63 | 6 | 0 | -3.739269 | 2.296945  | 1.135648  |
| 64 | 1 | 0 | -4.642243 | 1.869052  | 1.548136  |
| 65 | 6 | 0 | -2.443104 | -3.626259 | 4.187195  |
| 66 | 1 | 0 | -3.199785 | -3.937521 | 4.901992  |
| 67 | 6 | 0 | -0.467871 | 6.577732  | -3.162670 |
| 68 | 1 | 0 | -0.113062 | 5.748588  | -3.784645 |
| 69 | 1 | 0 | -1.256339 | 7.101875  | -3.713858 |
| 70 | 1 | 0 | 0.355903  | 7.284996  | -3.038301 |
| 71 | 6 | 0 | -1.581687 | -4.549220 | 3.636099  |
| 72 | 1 | 0 | -1.636647 | -5.596934 | 3.921969  |
| 73 | 6 | 0 | -5.203148 | -5.336418 | -2.863787 |
| 74 | 1 | 0 | -5.684297 | -5.932318 | -3.636008 |
| 75 | 6 | 0 | -2.312883 | 5.267976  | -2.222216 |
| 76 | 1 | 0 | -2.957717 | 4.998138  | -1.388273 |
| 77 | 1 | 0 | -2.907375 | 5.883862  | -2.906541 |
| 78 | 1 | 0 | -2.045570 | 4.346257  | -2.751416 |
| 79 | 6 | 0 | -3.827648 | -5.444071 | -2.704979 |
| 80 | 1 | 0 | -3.281611 | -6.118732 | -3.360445 |

|     |   |   |           |           |           |
|-----|---|---|-----------|-----------|-----------|
| 81  | 6 | 0 | -6.777198 | -0.387962 | -0.746337 |
| 82  | 1 | 0 | -7.616315 | 0.234063  | -1.049491 |
| 83  | 6 | 0 | 5.882066  | 2.485419  | -0.169902 |
| 84  | 1 | 0 | 6.846770  | 2.979796  | -0.141639 |
| 85  | 6 | 0 | -1.432550 | 7.301169  | -0.975458 |
| 86  | 1 | 0 | -0.551021 | 7.913271  | -0.753923 |
| 87  | 1 | 0 | -2.142714 | 7.924846  | -1.532119 |
| 88  | 1 | 0 | -1.899540 | 7.041304  | -0.020763 |
| 89  | 6 | 0 | 3.752437  | -3.697590 | -0.130487 |
| 90  | 1 | 0 | 3.563061  | -4.762453 | -0.138250 |
| 91  | 6 | 0 | -7.662081 | -2.559432 | -1.904326 |
| 92  | 1 | 0 | -8.595700 | -2.120553 | -2.248673 |
| 93  | 6 | 0 | 5.185352  | -1.831617 | -0.580889 |
| 94  | 1 | 0 | 6.109332  | -1.430224 | -0.974885 |
| 95  | 6 | 0 | -7.270655 | -3.782673 | -2.430982 |
| 96  | 1 | 0 | -7.912731 | -4.259824 | -3.167850 |
| 97  | 6 | 0 | 4.946159  | -3.210705 | -0.671538 |
| 98  | 6 | 0 | 7.063558  | 0.549666  | 0.891394  |
| 99  | 6 | 0 | 8.168047  | 0.206486  | -0.136089 |
| 100 | 1 | 0 | 8.430704  | 1.084262  | -0.737442 |
| 101 | 1 | 0 | 9.074805  | -0.127737 | 0.382963  |
| 102 | 1 | 0 | 7.872769  | -0.587632 | -0.827962 |
| 103 | 6 | 0 | 6.777584  | -0.661612 | 1.809318  |
| 104 | 1 | 0 | 6.531704  | -1.576506 | 1.274651  |
| 105 | 1 | 0 | 7.670113  | -0.865921 | 2.411337  |
| 106 | 1 | 0 | 5.953813  | -0.444148 | 2.498708  |
| 107 | 6 | 0 | 7.652787  | 1.626810  | 1.851208  |
| 108 | 1 | 0 | 6.897841  | 1.976388  | 2.563750  |
| 109 | 1 | 0 | 8.478657  | 1.186094  | 2.420377  |
| 110 | 1 | 0 | 8.056742  | 2.497791  | 1.329227  |
| 111 | 6 | 0 | 5.985425  | -4.130468 | -1.342391 |
| 112 | 6 | 0 | 7.315563  | -4.081208 | -0.553854 |
| 113 | 1 | 0 | 8.061862  | -4.729466 | -1.028846 |
| 114 | 1 | 0 | 7.731932  | -3.069464 | -0.515133 |
| 115 | 1 | 0 | 7.173967  | -4.426287 | 0.476977  |

|     |   |   |           |           |           |
|-----|---|---|-----------|-----------|-----------|
| 116 | 6 | 0 | 5.519545  | -5.598299 | -1.399052 |
| 117 | 1 | 0 | 5.371955  | -6.020877 | -0.398708 |
| 118 | 1 | 0 | 4.584693  | -5.708110 | -1.960383 |
| 119 | 1 | 0 | 6.281353  | -6.204309 | -1.901886 |
| 120 | 6 | 0 | 6.232411  | -3.651794 | -2.793288 |
| 121 | 1 | 0 | 5.306884  | -3.684404 | -3.379368 |
| 122 | 1 | 0 | 6.615792  | -2.626749 | -2.827996 |
| 123 | 1 | 0 | 6.969188  | -4.298981 | -3.284274 |
| 124 | 6 | 0 | -4.466207 | 4.611547  | 2.008969  |
| 125 | 6 | 0 | -5.644310 | 3.855034  | 2.652513  |
| 126 | 1 | 0 | -6.266191 | 3.348690  | 1.905627  |
| 127 | 1 | 0 | -5.301873 | 3.107614  | 3.377200  |
| 128 | 1 | 0 | -6.286300 | 4.564444  | 3.186434  |
| 129 | 6 | 0 | -3.703050 | 5.351198  | 3.134000  |
| 130 | 1 | 0 | -3.290395 | 4.641872  | 3.860461  |
| 131 | 1 | 0 | -2.874323 | 5.950719  | 2.743393  |
| 132 | 1 | 0 | -4.380820 | 6.028600  | 3.667204  |
| 133 | 6 | 0 | -5.044494 | 5.647921  | 1.016506  |
| 134 | 1 | 0 | -5.731104 | 6.328130  | 1.534919  |
| 135 | 1 | 0 | -4.258866 | 6.256245  | 0.556494  |
| 136 | 1 | 0 | -5.600925 | 5.153082  | 0.211960  |

---

## 9 Reference

- (S1) Xu, Q.; Wang, C.; Zhao, Y.; Zheng, D.; Shao, C.; Guo, W.; Deng, X.; Wang, Y.; Chen, X.; Zhu, J.; Jiang, H. Tuning the Properties of Corannulene-Based Polycyclic Aromatic Hydrocarbons by Varying the Fusing Positions of Corannulene. *Org. Lett.* **2020**, *22*, 7397-7402.
- (S2) Mack, J.; Vogel, P.; Jones, D.; Kaval, N.; Sutton, A. The development of corannulene-based blue emitters. *Org. Biomol. Chem.* **2007**, *5*, 2448-2452.
- (S3) Zhao, H.-J.; Zhou, Z.-Z.; Zhang, Y.; Su, X.; Chen, X.-M.; Liang, Y.-M. Visible-light-mediated borylation of aryl and alkyl halides with a palladium complex. *Org. Biomol. Chem.* **2020**, *18*, 4390-4394.
- (S4) Dolomanov, O. V.; Bourhis, L. J.; Gildea, R. J.; Howard, J. A. K.; Puschmann, H. *J. Appl. Cryst.* **2009**, *42*, 339-341.
- (S5) Sheldrick, G. M. *Acta Cryst.* **2015**, A71, 3-8.
- (S6) Sheldrick, G. M. *Acta Cryst.* **2015**, C71, 3-8.
- (S7) Spek, A. L. *Acta Cryst.* **2015**, C71, 9-18.

(S8) Gaussian 09, Revision D.01, Frisch, M. J.; Trucks, G. W.; Schlegel, H. B.; Scuseria, G. E.; Robb, M. A.; Cheeseman, J. R.; Scalmani, G.; Barone, V.; Mennucci, B.; Petersson, G. A.; Nakatsuji, H.; Caricato, M.; Li, X.; Hratchian, H. P.; Izmaylov, A. F.; Bloino, J.; Zheng, G.; Sonnenberg, J. L.; Hada, M.; Ehara, M.; Toyota, K.; Fukuda, R.; Hasegawa, J.; Ishida, M.; Nakajima, T.; Honda, Y.; Kitao, O.; Nakai, H.; Vreven, T.; Montgomery, J. A., Jr.; Peralta, J. E.; Ogliaro, F.; Bearpark, M.; Heyd, J. J.; Brothers, E.; Kudin, K. N.; Staroverov, V. N.; Kobayashi, R.; Normand, J.; Raghavachari, K.; Rendell, A.; Burant, J. C.; Iyengar, S. S.; Tomasi, J.; Cossi, M.; Rega, N.; Millam, M. J.; Klene, M.; Knox, J. E.; Cross, J. B.; Bakken, V.; Adamo, C.; Jaramillo, J.; Gomperts, R.; Stratmann, R. E.; Yazyev, O.; Austin, A. J.; Cammi, R.; Pomelli, C.; Ochterski, J. W.; Martin, R. L.; Morokuma, K.; Zakrzewski, V. G.; Voth, G. A.; Salvador, P.; Dannenberg, J. J.; Dapprich, S.; Daniels, A. D.; Farkas, Ö.; Foresman, J. B.; Ortiz, J. V.; Cioslowski, J.; Fox, D. J. Gaussian 09, Revision D.01; Gaussian, Inc.: Wallingford, CT, 2013.

(S9) (a) Herges, R.; Geuenich, D. *J. Phy. Chem. A* **2001**, 105, 3214-3220. (b) Geuenich, D.; Hess, K.; Kohler, F.; Herges, R. *Chem. Rev.* **2005**, 105, 3758-3772.

(S10) (a) Steiner, E.; Fowler, P. W.; Jenneskens, L. W. *Angew. Chem. Int. Ed.* **2001**, 40, 362-366. (b) Morita, Y.; Ueda, A.; Nishida, S.; Fukui, K.; Ise, T.; Shiomi, D.; Sato, K.; Takui, T.; Nakasuji, K. *Angew. Chem. Int. Ed.* **2008**, 47, 2035-2038. (c) Spisak, S. N.; Li, J.; Rogachev, A. Y.; Wei, Z.; Papaianina, O.; Amsharov, K.; Rybalchenko, A. V.; Goryunkov, A. A.; Petrukhhina, M. A. *Organometallics*. **2016**, 35, 3105-3111. (d) Dickens, T. K.; Mallion, R. B. *J. Phy. Chem. A* **2018**, 122, 7666-7678.
